# Supplementary material for: The MHC class I peptide repertoire is molded by the transcriptome
Source: PubMed Central journal article supplement — J Exp Med. 2008 Mar 17;205(3):595–610. doi: 10.1084/jem.20071985 (PMC2275383; doi:10.1084/jem.20071985), 2008-03-17
Supplement: jexpmed_jem.20071985_3.pdf [file jexpmed_jem.20071985_3.pdf]

**Table S1.** Relative abundance of peptides eluted from WT,  $\beta 2m^{-}$ , and  $\beta 2m^{+}$  EL4 cell lines

| Gene ID | Gene symbol          | Peptide     | WT       | Intensities from |                | Fold change<br>WT/ $\beta 2m^{-}$ |
|---------|----------------------|-------------|----------|------------------|----------------|-----------------------------------|
|         |                      |             |          | $\beta 2m^{-}$   | $\beta 2m^{+}$ |                                   |
| 68523   | <i>1110019N10Rik</i> | AALENTHLL   | 160364   | 12000            | 39986          | 13                                |
| 66185   | <i>1110037F02Rik</i> | RQILNADAM   | 364055   | 12000            | 227326         | 30                                |
| 67463   | <i>1200014M14Rik</i> | GALENAKAEI  | 191356   | 12000            | 381782         | 16                                |
| 74174   | <i>1700006H03Rik</i> | NSPANNIVM   | 68002    | 12000            | 1534480        | 6                                 |
| 100910  | <i>2010209012Rik</i> | AQIRNLTVL   | 212465   | 12000            | 106874         | 18                                |
| 76559   | <i>2410024A21Rik</i> | AGPENSSKI   | 216979   | 12000            | 649743         | 18                                |
| 75425   | <i>2610036D13Rik</i> | QTVENVEHL   | 356744   | 52221            | 827933         | 7                                 |
| 67268   | <i>2900073G15Rik</i> | SMGKNPTDEYL | 4278255  | 12000            | 11467376       | 357                               |
| 77877   | <i>6030458C11Rik</i> | KVLDVLHSL   | 63278    | 12000            | 71265          | 5                                 |
| 338523  | <i>A630082K20Rik</i> | SSIQNGKYTL  | 1351220  | 12000            | 480198         | 113                               |
| 18671   | <i>Abcb1a</i>        | STVRNADVI   | 3232678  | 12000            | 12000          | 269                               |
| 11307   | <i>Abcg1</i>         | VNIEFKDL    | 838637   | 12000            | 2348761        | 70                                |
| 104112  | <i>Acly</i>          | SIANFTNV    | 59580    | 12000            | 225167         | 5                                 |
| 66713   | <i>Actr2</i>         | YAGSNFPEHI  | 5117498  | 12000            | 6554584        | 426                               |
| 67019   | <i>Actr6</i>         | SGYSFTHI    | 428791   | 12000            | 996812         | 36                                |
| 226747  | <i>Ahctf1</i>        | TSVENHEFL   | 676119   | 12000            | 1115879        | 56                                |
| 223774  | <i>Alg12</i>         | AAMLNYTHI   | 121626   | 12000            | 450762         | 10                                |
| 81702   | <i>Ankrd17</i>       | ASVLNVNHI   | 7537305  | 12000            | 14073365       | 628                               |
| 11765   | <i>Ap1g1</i>         | FALVNGNNI   | 238448   | 12000            | 508707         | 20                                |
| 71435   | <i>Arhgap21</i>      | TGVTNRDLI   | 421388   | 12000            | 194111         | 35                                |
| 11984   | <i>Atp6v0c</i>       | SAMVFSAM    | 100221   | 12000            | 314743         | 8                                 |
| 328099  | <i>AU021838</i>      | VSYLFSHV    | 163732   | 12000            | 285904         | 14                                |
| 66165   | <i>Bccip</i>         | KAPVNTAEL   | 1741908  | 12000            | 998607         | 145                               |
| 213895  | <i>Bms1l</i>         | YQNQEIHNL   | 1272300  | 12000            | 1633700        | 106                               |
| 12176   | <i>Bnip3</i>         | LSMRNTSVM   | 133906   | 12000            | 371093         | 11                                |
| 12181   | <i>Bop1</i>          | EQVALVHRL   | 306162   | 12000            | 1219215        | 26                                |
| 107976  | <i>Bre</i>           | ATQVYPKL    | 1147903  | 12000            | 3484401        | 96                                |
| 224171  | <i>C330027C09Rik</i> | AQNDIEHLF   | 1329747  | 12000            | 1373696        | 111                               |
| 76740   | <i>C920006C10Rik</i> | SAIINEDNL   | 899101   | 12000            | 1629693        | 75                                |
| 69719   | <i>Cad</i>           | RQAENGYMI   | 92562    | 12000            | 1267863        | 8                                 |
| 12340   | <i>Capza1</i>        | ISFKFDHL    | 35372    | 12000            | 56253          | 3                                 |
| 26885   | <i>Casp8ap2</i>      | VTVLNVDDL   | 285120   | 12000            | 299518         | 24                                |
| 12449   | <i>Ccnf</i>          | SOAVNKQOI   | 236020   | 68580            | 828654         | 3                                 |
| 12465   | <i>Cct5</i>          | SMMDVDHQI   | 1326343  | 12000            | 2363592        | 111                               |
| 12468   | <i>Cct7</i>          | RAIKNDSVV   | 930640   | 12000            | 1300660        | 78                                |
| 12576   | <i>Cdkn1b</i>        | FGPVNHEEL   | 11267481 | 12000            | 17543161       | 939                               |
| 229841  | <i>Cenpe</i>         | SALQNAESDRL | 1125746  | 12000            | 2349902        | 94                                |
| 216859  | <i>Centb1</i>        | INQIYEARV   | 691884   | 12000            | 1065038        | 58                                |
| 12649   | <i>Chek1</i>         | TGPSNVDKL   | 6545497  | 112308           | 14733333       | 58                                |
| 214901  | <i>Chtf18</i>        | QLSDTLHSL   | 61094    | 12000            | 190594         | 5                                 |
| 80986   | <i>Ckap2</i>         | TLNDLIHNI   | 136301   | 12000            | 345332         | 11                                |
| 234594  | <i>Cnot1</i>         | IAFIFNNL    | 46952    | 12000            | 74559          | 4                                 |
| 12847   | <i>Copa</i>          | SQLPVDHIL   | 404318   | 12000            | 676882         | 34                                |
| 12877   | <i>Cpeb1</i>         | SMLQNPLGNVL | 185198   | 12000            | 528268         | 15                                |
| 68975   | <i>Crsp8</i>         | SGLLNQQL    | 978436   | 99069            | 1634916        | 10                                |
| 71745   | <i>Cul2</i>          | VINSFVHV    | 67372    | 12000            | 244370         | 6                                 |
| 215821  | <i>D10Bwg1379e</i>   | AVLTNQETI   | 158503   | 12000            | 747537         | 13                                |
| 52635   | <i>D12Ertd551e</i>   | RQLENGTTL   | 1477468  | 12000            | 1284587        | 123                               |
| 218978  | <i>D14Ertd436e</i>   | SQHVNLDDL   | 322974   | 12000            | 690276         | 27                                |
| 229473  | <i>D930015E06Rik</i> | ASLVNSPSYL  | 160789   | 12000            | 1730981        | 13                                |
| 208846  | <i>Daam1</i>         | AAKVMNTEL   | 2278053  | 12000            | 1980628        | 190                               |
| 68087   | <i>Dcakd</i>         | VIQVFQQL    | 241295   | 12000            | 464584         | 20                                |
| 67755   | <i>Ddx47</i>         | KTFLEFSATM  | 70060    | 12000            | 289017         | 6                                 |
| 13209   | <i>Ddx6</i>          | INFDFPKL    | 207697   | 12000            | 58611          | 17                                |
| 72121   | <i>Dennd2d</i>       | VIYPFMQGL   | 507408   | 28423            | 12000          | 18                                |
| 217207  | <i>Dhx8</i>          | QLYTLGAL    | 185369   | 12000            | 505758         | 15                                |
| 94176   | <i>Dock2</i>         | SMVQNRVFL   | 895081   | 12000            | 671603         | 75                                |
| 233115  | <i>Dpy19l3</i>       | SVWAFHNL    | 2131426  | 12000            | 1928879        | 178                               |
| 76843   | <i>Dtl</i>           | SSPENKNWL   | 2840050  | 12000            | 10831315       | 237                               |
| 13424   | <i>Dync1h1</i>       | ASYEFVQRL   | 2201922  | 33937            | 1946008        | 65                                |
| 66967   | <i>Edem3</i>         | FMATNPEHL   | 255530   | 12000            | 303884         | 21                                |
| 13669   | <i>Eif3s10</i>       | QSIEFSRL    | 3331791  | 12000            | 6269562        | 278                               |
| 15569   | <i>Elavl2</i>        | GAVTNVKVI   | 120705   | 12000            | 327586         | 10                                |
| 14791   | <i>Emg1</i>          | VSYEYTEKM   | 133779   | 12000            | 214864         | 11                                |
| 66366   | <i>Ergic3</i>        | QQLDVEHNL   | 1458352  | 12000            | 807276         | 122                               |
| 13877   | <i>Erh</i>           | YQPYNKDWI   | 108556   | 12000            | 29068          | 9                                 |
| 14050   | <i>Eya3</i>          | TIHIFHSL    | 465796   | 12000            | 216132         | 39                                |
| 212377  | <i>F730047E07Rik</i> | VGVTYRTL    | 84194    | 12000            | 462448         | 7                                 |
| 70611   | <i>Fbxo33</i>        | SSLSNPIANTM | 127288   | 12000            | 69463          | 11                                |
| 14137   | <i>Fdft1</i>         | ISLEFRNL    | 523739   | 12000            | 130109         | 44                                |
| 57778   | <i>Fmnl1</i>         | LQYEFTHL    | 770529   | 12000            | 1208086        | 64                                |
| 22379   | <i>Fmnl3</i>         | LQYEFTKL    | 642004   | 12000            | 934003         | 54                                |
| 108655  | <i>Foxp1</i>         | QQLQQQHLL   | 705266   | 12000            | 1054408        | 59                                |
| 239554  | <i>Foxred2</i>       | LGVTNFVHM   | 168986   | 12000            | 118096         | 14                                |
| 56784   | <i>Garnl1</i>        | GAIVNGKVL   | 83646    | 12000            | 315141         | 7                                 |
| 14751   | <i>Gpi1</i>          | KNLVNKEVM   | 318694   | 12000            | 560091         | 27                                |
| 14790   | <i>Grcc10</i>        | SAPENAVRM   | 3768572  | 12000            | 48595185       | 314                               |

|        |                   |               |          |        |          |      |
|--------|-------------------|---------------|----------|--------|----------|------|
| 68153  | <i>Gtf2e2</i>     | SGYKFGVL      | 537587   | 12000  | 2451306  | 45   |
| 69237  | <i>Gtpbp4</i>     | QILSDFPKL     | 395416   | 12000  | 225758   | 33   |
| 15016  | <i>H2-Q5</i>      | AMAPRTLLL     | 5436819  | 12000  | 12941105 | 453  |
| 15201  | <i>Hells</i>      | KVLVFSQM      | 475943   | 12000  | 1183394  | 40   |
| 319189 | <i>Hist2h2bb</i>  | SVVYKVL       | 871990   | 12000  | 3175247  | 73   |
| 382522 | <i>Hist3h2bb</i>  | VNDIFERI      | 91065    | 12000  | 63614    | 8    |
| 15368  | <i>Hmox1</i>      | IQAENAEFM     | 531189   | 12000  | 12000    | 44   |
| 15387  | <i>Hnrpk</i>      | DQIQNAQYL     | 99408    | 12000  | 43071    | 8    |
| 23918  | <i>Impdh2</i>     | GGIQNVGHI     | 932864   | 90438  | 5379787  | 10   |
| 16867  | <i>Lhcgr</i>      | SILLNNAVAF    | 185982   | 12000  | 1613907  | 15   |
| 545270 | <i>LOC545270</i>  | YALYNNWEHM    | 118954   | 12000  | 102363   | 10   |
| 72416  | <i>Lrpprc</i>     | AAIENIEHL     | 384743   | 12000  | 385640   | 32   |
| 99470  | <i>Magi3</i>      | SGLTNRDTL     | 159958   | 12000  | 3688747  | 13   |
| 56692  | <i>Map2k1ip1</i>  | QVVQFNRL      | 114970   | 12000  | 140373   | 10   |
| 26413  | <i>Mapk1</i>      | VGPRYTNL      | 39166667 | 149969 | 45832060 | 261  |
| 212307 | <i>Mapre2</i>     | QLNEQVHSL     | 493384   | 12000  | 1547458  | 41   |
| 17168  | <i>Mare</i>       | SAVKNLQQL     | 4185921  | 12000  | 2766551  | 349  |
| 17169  | <i>Mark3</i>      | TSIAFKNI      | 57818    | 12000  | 289972   | 5    |
| 17427  | <i>Mns1</i>       | KIIEFANI      | 65858    | 12000  | 12000    | 5    |
| 17863  | <i>Myb</i>        | NAIKNHWNSTM   | 668372   | 12000  | 338244   | 56   |
| 67938  | <i>Mylc2b</i>     | SLGKNPTDAYL   | 503898   | 12000  | 4119401  | 42   |
| 74838  | <i>Narg1</i>      | SAVENLNEM     | 615625   | 12000  | 297903   | 51   |
| 17992  | <i>Ndufa4</i>     | VNVVYSKL      | 14338076 | 12000  | 29429606 | 1195 |
| 227197 | <i>Ndufs1</i>     | AKLVNQEVL     | 503868   | 12000  | 908787   | 42   |
| 64652  | <i>Nisch</i>      | TNQDFIQR      | 123915   | 12000  | 948264   | 10   |
| 68979  | <i>Nol11</i>      | TQLIQTHVL     | 515769   | 62667  | 1499186  | 8    |
| 66394  | <i>Nosip</i>      | TSVRFTQL      | 3518404  | 12000  | 7472080  | 293  |
| 18145  | <i>Npc1</i>       | VAVNKNVDI     | 243630   | 12000  | 356718   | 20   |
| 101706 | <i>Numa1</i>      | VSILNRQVL     | 365089   | 12000  | 799609   | 30   |
| 69482  | <i>Nup35</i>      | AQYGNILKHVM   | 78184    | 12000  | 610648   | 7    |
| 18519  | <i>Pcaf</i>       | VQYKFSHL      | 7220707  | 12000  | 5160299  | 602  |
| 14827  | <i>Pdia3</i>      | FAHTNIESL     | 7732607  | 107365 | 2392144  | 72   |
| 23986  | <i>Peci</i>       | SSYTFPKM      | 1349403  | 12000  | 12000    | 112  |
| 75725  | <i>Phf14</i>      | VNYFERNM      | 48515    | 12000  | 12000    | 4    |
| 236539 | <i>Phgdh</i>      | TGVVNAQAL     | 324963   | 12000  | 1003626  | 27   |
| 233489 | <i>Picalm</i>     | NGVINAAFM     | 265420   | 12000  | 438191   | 22   |
| 233489 | <i>Picalm</i>     | VAFDFTKV      | 622109   | 12000  | 1026908  | 52   |
| 224938 | <i>Pja2</i>       | SSVQNGIML     | 186205   | 33856  | 525538   | 5    |
| 59047  | <i>Pnkp</i>       | YVHVNRDTL     | 1160230  | 12000  | 178123   | 97   |
| 231329 | <i>Polr2b</i>     | IGPTYQRL      | 393502   | 12000  | 716661   | 33   |
| 218832 | <i>Polr3a</i>     | VTIQNSELM     | 206677   | 12000  | 12000    | 17   |
| 19015  | <i>Ppard</i>      | ASIVNKDGL     | 144953   | 12000  | 217899   | 12   |
| 170826 | <i>Ppargc1b</i>   | LSVRNGATL     | 218140   | 12000  | 267046   | 18   |
| 54397  | <i>Ppt2</i>       | SSYSFRHL      | 283225   | 12000  | 919892   | 24   |
| 106042 | <i>Prickle1</i>   | LNKYFPG       | 376026   | 12000  | 124373   | 31   |
| 23992  | <i>Prkra</i>      | ISPENHISL     | 84113    | 12000  | 1206217  | 7    |
| 16913  | <i>Psmb8</i>      | GGVVNMYHM     | 3322728  | 12000  | 185723   | 277  |
| 15170  | <i>Ptpn6</i>      | AQYKFIYV      | 1303118  | 12000  | 1598969  | 109  |
| 78697  | <i>Pus7</i>       | TSIKNQTL      | 84865    | 12000  | 160379   | 7    |
| 110816 | <i>Pwp2</i>       | FAYRFSNL      | 218474   | 12000  | 126002   | 18   |
| 70314  | <i>Rabep2</i>     | AQVQNSEQ      | 1384849  | 46060  | 843925   | 30   |
| 74734  | <i>Rhoh</i>       | YSVANHNSFL    | 1605054  | 82775  | 2637549  | 19   |
| 68477  | <i>Rmnd5a</i>     | WAVSNREML     | 79683    | 12000  | 116624   | 7    |
| 22644  | <i>Rnf103</i>     | KTIYNVEHL     | 54697    | 12000  | 148600   | 5    |
| 66480  | <i>Rpl15</i>      | STYKFEV       | 423190   | 12000  | 263479   | 35   |
| 19942  | <i>Rpl27</i>      | KTVWNKDFV     | 783897   | 12000  | 3144986  | 65   |
| 67891  | <i>Rpl4</i>       | VNFVHTNL      | 2514370  | 12000  | 1519392  | 210  |
| 267019 | <i>Rps15a</i>     | VIVRFLTV      | 514406   | 12000  | 12000    | 43   |
| 267019 | <i>Rps15a</i>     | VIVRFLTVM     | 388796   | 12000  | 57863    | 32   |
| 20115  | <i>Rps7</i>       | QQNNVEHKV     | 1979899  | 12000  | 2175109  | 165  |
| 20133  | <i>Rrm1</i>       | FQIVNPHLL     | 2977570  | 40671  | 1830528  | 7    |
| 20133  | <i>Rrm1</i>       | YGIRNSLLI     | 1677107  | 174840 | 647604   | 10   |
| 269254 | <i>Setx</i>       | SQLENKTI      | 204933   | 12000  | 137119   | 17   |
| 81898  | <i>Sf3b1</i>      | KAIVNVIGM     | 78160    | 12000  | 335976   | 7    |
| 170755 | <i>Sgk3</i>       | YSIVNASVL     | 255048   | 38491  | 151335   | 7    |
| 20425  | <i>Shmt1</i>      | RNLDYARL      | 147317   | 12000  | 921297   | 12   |
| 63959  | <i>Slc29a1</i>    | SAIFNNVMTL    | 61949    | 12000  | 295795   | 5    |
| 20527  | <i>Slc2a3</i>     | TGVINAPETI    | 6643529  | 12000  | 5706248  | 554  |
| 20586  | <i>Smarca4</i>    | TQVLNTHYV     | 276940   | 12000  | 121529   | 23   |
| 20740  | <i>Spna2</i>      | KALINADEL     | 4393266  | 12000  | 1485888  | 366  |
| 20815  | <i>Srpk1</i>      | ISGVNGTHI     | 1109459  | 12000  | 1330242  | 92   |
| 67437  | <i>Ssr3</i>       | VAFAYKNV      | 413665   | 12000  | 1416589  | 34   |
| 20448  | <i>St6galnac4</i> | QVYFTERM      | 233788   | 12000  | 170957   | 19   |
| 20848  | <i>Stat3</i>      | ATLVFHNL      | 4023137  | 12000  | 6208130  | 335  |
| 58523  | <i>Statip1</i>    | SAPRNFVENF    | 7865121  | 248931 | 13541769 | 32   |
| 16430  | <i>Stt3a</i>      | AVLSFSTR      | 42362    | 12000  | 41291    | 4    |
| 21687  | <i>Tek</i>        | NDIKFQDV      | 43651    | 12000  | 142042   | 4    |
| 22042  | <i>Tffc</i>       | KAFTYINL      | 435591   | 12000  | 480537   | 36   |
| 21894  | <i>Tln1</i>       | SVMENSKVLGEAM | 522658   | 12000  | 352355   | 44   |
| 70549  | <i>Tln2</i>       | SVMENSKVLGESM | 52094    | 12000  | 41337    | 4    |
| 66074  | <i>Tmem167</i>    | SAIFNFQSL     | 56289    | 12000  | 320506   | 5    |
| 67878  | <i>Tmem33</i>     | QSIAFISRL     | 394668   | 12000  | 166467   | 33   |

|        |                |            |         |        |         |     |
|--------|----------------|------------|---------|--------|---------|-----|
| 21916  | <i>Tmod1</i>   | SSIVNKEGL  | 689429  | 12000  | 96959   | 57  |
| 217351 | <i>Tnrc6c</i>  | TSPINPQHM  | 341556  | 12000  | 1238666 | 28  |
| 22142  | <i>Tuba1a</i>  | DIERTYTNL  | 656598  | 157480 | 1267632 | 4   |
| 22142  | <i>Tuba1a</i>  | ERPTYTNL   | 816936  | 86447  | 698017  | 9   |
| 53382  | <i>Txn1</i>    | FQNVNSVTL  | 1199864 | 12000  | 1713670 | 100 |
| 67123  | <i>Ubp1</i>    | KSLSPKPL   | 255902  | 12000  | 697677  | 21  |
| 19704  | <i>Upf1</i>    | SGYIYHKL   | 1545046 | 12000  | 391481  | 129 |
| 326622 | <i>Upf2</i>    | SAVIFRTL   | 244247  | 12000  | 1102686 | 20  |
| 216825 | <i>Usp22</i>   | FAVNVHQGTL | 711737  | 12000  | 12000   | 59  |
| 230895 | <i>Vps13d</i>  | INIHYYQL   | 188518  | 12000  | 90025   | 16  |
| 80743  | <i>Vps16</i>   | VSFTYRYL   | 794606  | 57587  | 689203  | 14  |
| 233405 | <i>Vps33b</i>  | ASLVNADKL  | 2323671 | 12000  | 2376572 | 194 |
| 65114  | <i>Vps35</i>   | FSEENHEPL  | 345757  | 12000  | 562939  | 29  |
| 241627 | <i>Wdr76</i>   | FSPTNPAHL  | 164815  | 12000  | 599612  | 14  |
| 22446  | <i>Xlr3b</i>   | VAAANREVL  | 1654355 | 12000  | 1362836 | 138 |
| 103573 | <i>Xpo1</i>    | TILEFSQNM  | 561596  | 12000  | 2010930 | 47  |
| 68090  | <i>Yif1a</i>   | SGYKYVGM   | 300842  | 12000  | 1171758 | 25  |
| 66980  | <i>Zdhhc6</i>  | SVIKFENL   | 863986  | 12000  | 734576  | 72  |
| 67187  | <i>Zmynd19</i> | ESYSFEARM  | 132049  | 12000  | 253228  | 11  |

**Table S2.** Computed MHC binding affinity of MHC I-associated peptides eluted from EL4 cells

| <b>MHC Ia-associated peptides</b> |                      |             |                  |           |      |          |
|-----------------------------------|----------------------|-------------|------------------|-----------|------|----------|
| GeneID                            | Gene symbol          | Peptide     | Restriction size | SYFPEITHI | smm  | smm-rank |
| 68523                             | <i>1110019N10Rik</i> | AALENTLL    | Db 9-mer         | 30        | 327  | 1/309    |
| 66185                             | <i>1110037F02Rik</i> | RQILNADAM   | Db 9-mer         | 25        | 13   | 1/3705   |
| 67463                             | <i>1200014M14Rik</i> | GALENAKAEI  | Db 10-mer        | 30        | 286  | 2/1099   |
| 74174                             | <i>1700006H03Rik</i> | NSPANNIVM   | Db 9-mer         | 25        | 28   | 1/317    |
| 100910                            | <i>2010209012Rik</i> | AQIRNLTVL   | Db 9-mer         | 30        | 20   | 1/713    |
| 76559                             | <i>2410024A21Rik</i> | AGPENSSKI   | Db 9-mer         | 30        | 2402 | 110/4133 |
| 75425                             | <i>2610036D13Rik</i> | QTVENVEHL   | Db 9-mer         | 27        | 635  | 15/2153  |
| 67268                             | <i>2900073G15Rik</i> | SMGKNPTDEYL | Db 11-mer        | 20        | 344  | 3/327    |
| 338523                            | <i>A630082K20Rik</i> | SSIQNGKYTL  | Db 10-mer        | 29        | 273  | 9/1761   |
| 18671                             | <i>Abcb1a</i>        | STVRNADVI   | Db 9-mer         | 28        | 10   | 1/2535   |
| 11307                             | <i>Abcg1</i>         | VNIEFKDL    | Kb 8-mer         | 23        | 107  | 16/1177  |
| 104112                            | <i>Acly</i>          | SIANFTNV    | Kb 8-mer         | 20        | 198  | 33/2167  |
| 66713                             | <i>Actr2</i>         | YAGSNFPEHI  | Db 10-mer        | 29        | 386  | 4/771    |
| 67019                             | <i>Actr6</i>         | SGYSFTHI    | Kb 8-mer         | 25        | 39   | 4/777    |
| 226747                            | <i>Ahctf1</i>        | TSVENHEFL   | Db 9-mer         | 30        | 67   | 1/2235   |
| 223774                            | <i>Alg12</i>         | AAMLNYTHI   | Db 9-mer         | 28        | 4    | 1/753    |
| 81702                             | <i>Ankrd17</i>       | ASVLNVNHI   | Db 9-mer         | 27        | 87   | 5/5189   |
| 11765                             | <i>Ap1g1</i>         | FALVNGNNI   | Db 9-mer         | 29        | 23   | 1/1633   |
| 71435                             | <i>Arhgap21</i>      | TGVTNRDLI   | Db 9-mer         | 29        | 392  | 7/3875   |
| 11984                             | <i>Atp6v0c</i>       | SAMVFSAM    | Kb 8-mer         | 19        | 84   | 3/295    |
| 328099                            | <i>AU021838</i>      | VSYLFSHV    | Kb 8-mer         | 24        | 3    | 1/487    |
| 66165                             | <i>Bccip</i>         | KAPVNTAEL   | Db 9-mer         | 31        | 43   | 1/615    |
| 12176                             | <i>Bnip3</i>         | LSMRNTSVM   | Db 9-mer         | 24        | 14   | 1/357    |
| 107976                            | <i>Bre</i>           | ATQVYPKL    | Kb 8-mer         | 22        | 67   | 7/751    |
| 76740                             | <i>C920006C10Rik</i> | SAIINEDNL   | Db 9-mer         | 29        | 19   | 1/1621   |
| 69719                             | <i>Cad</i>           | RQAENGMVI   | Db 9-mer         | 24        | 732  | 26/4433  |
| 12340                             | <i>Capza1</i>        | ISFKFDHL    | Kb 8-mer         | 23        | 6    | 1/557    |
| 26885                             | <i>Casp8ap2</i>      | VTVLNVDDL   | Db 9-mer         | 26        | 30   | 1/3907   |
| 12449                             | <i>Ccnf</i>          | SQAVNKQOI   | Db 9-mer         | 26        | 588  | 4/1537   |
| 12468                             | <i>Cct7</i>          | RAIKNSDVV   | Db 9-mer         | 22        | 27   | 1/1071   |
| 12576                             | <i>Cdkn1b</i>        | FGPVNHEEL   | Db 9-mer         | 33        | 77   | 1/377    |
| 229841                            | <i>Cenpe</i>         | SALQNAESDRL | Db 11-mer        | 22        | 76   | 1/4925   |
| 216859                            | <i>Centb1</i>        | INQIYEARV   | Kb 9-mer         | 13        | 268  | 243/1265 |
| 12649                             | <i>Chek1</i>         | TGPSNVDKL   | Db 9-mer         | 29        | 784  | 7/935    |
| 234594                            | <i>Cnot1</i>         | IAFIFNNL    | Kb 8-mer         | 23        | 5    | 1/4751   |
| 12877                             | <i>Cpeb1</i>         | SMLQNPLGNVL | Db 11-mer        | 23        | 456  | 10/1105  |
| 68975                             | <i>Crsp8</i>         | SGLLNQOQL   | Db 9-mer         | 28        | 118  | 1/605    |
| 71745                             | <i>Cul2</i>          | VINSFVHV    | Kb 8-mer         | 17        | 527  | 92/1397  |
| 215821                            | <i>D10Bwg1379e</i>   | AVLTNQETI   | Db 9-mer         | 28        | 73   | 4/4323   |
| 52635                             | <i>D12Ert551e</i>    | RQLENGTTL   | Db 9-mer         | 28        | 33   | 1/1673   |
| 218978                            | <i>D14Ert436e</i>    | SQHVNLDDL   | Db 9-mer         | 29        | 61   | 1/967    |
| 229473                            | <i>D930015E06Rik</i> | ASLVNSPSYL  | Db 10-mer        | 31        | 730  | 48/3177  |
| 208846                            | <i>Daam1</i>         | AAKVNMTL    | Db 9-mer         | 30        | 171  | 4/2137   |
| 68087                             | <i>Dcald</i>         | VIQVFOQL    | Kb 8-mer         | 22        | 33   | 2/447    |
| 67755                             | <i>Ddx47</i>         | KTFLFSATM   | Kb 9-mer         | 11        | 33   | 14/755   |
| 13209                             | <i>Ddx6</i>          | INFDFPKL    | Kb 8-mer         | 24        | 7    | 1/811    |
| 72121                             | <i>Dennd2d</i>       | VIYPFMQGL   | Kb 9-mer         | 18        | 4    | 4/923    |
| 217207                            | <i>Dhx8</i>          | QLYTLGAL    | Kb 8-mer         | 16        | 1953 | 332/2473 |
| 94176                             | <i>Dock2</i>         | SMVQNRVFL   | Db 9-mer         | 29        | 7    | 2/3639   |
| 233115                            | <i>Dpy19l3</i>       | SVVAFHNL    | Kb 8-mer         | 22        | 44   | 6/1417   |
| 76843                             | <i>Dtl</i>           | SSPENKNWL   | Db 9-mer         | 29        | 291  | 2/1441   |
| 13424                             | <i>Dync1h1</i>       | ASYEFVQRL   | Kb 9-mer         | 20        | 18   | 4/9133   |
| 66967                             | <i>Edem3</i>         | FMATNPEHL   | Db 9-mer         | 28        | 32   | 1/1845   |
| 22446                             | <i>Xlr3b</i>         | VAAANREVL   | Db 9-mer         | 26        | 111  | 1/435    |
| 13669                             | <i>Eif3s10</i>       | QSIIEFSL    | Kb 8-mer         | 24        | 28   | 1/1267   |
| 15569                             | <i>Elavl2</i>        | GAVTNVKVI   | Db 9-mer         | 26        | 42   | 1/703    |
| 14791                             | <i>Emg1</i>          | VSVEYTEKM   | Kb 9-mer         | 13        | 58   | 8/473    |
| 13877                             | <i>Erh</i>           | YQPYNKDWI   | Db 9-mer         | 26        | 48   | 1/191    |
| 14050                             | <i>Eya3</i>          | TIIEFHSL    | Kb 8-mer         | 22        | 45   | 4/1005   |
| 212377                            | <i>F730047E07Rik</i> | VGVTYRTL    | Kb 8-mer         | 23        | 28   | 2/1911   |
| 70611                             | <i>Fbxo33</i>        | SLSLNPIANTM | Db 11-mer        | 17        | 107  | 1/575    |
| 14137                             | <i>Fdft1</i>         | ISLEFRNL    | Kb 8-mer         | 25        | 3    | 1/677    |
| 57778                             | <i>Fmnl1</i>         | LQYEFTHL    | Kb 8-mer         | 29        | 19   | 1/2173   |
| 22379                             | <i>Fmnl3</i>         | LQYEFTKL    | Kb 8-mer         | 30        | 25   | 2/2011   |
| 239554                            | <i>Foxred2</i>       | LGVTNFVHM   | Db 9-mer         | 28        | 247  | 3/1313   |
| 56784                             | <i>Garnl1</i>        | GAIVNGKVL   | Db 9-mer         | 27        | 27   | 2/4149   |
| 14751                             | <i>Gpi1</i>          | KNLVNKEVM   | Db 9-mer         | 27        | 198  | 2/1099   |
| 14790                             | <i>Grcc10</i>        | SAPENAVRM   | Db 9-mer         | 33        | 165  | 2/235    |
| 68153                             | <i>Gtf2e2</i>        | SGYKFGVL    | Kb 8-mer         | 29        | 18   | 1/569    |
| 69237                             | <i>Gtpbp4</i>        | QILSDFPKL   | Kb 9-mer         | 23        | 231  | 19/1253  |
| 15201                             | <i>Hells</i>         | KVLVFSQM    | Kb 8-mer         | 18        | 254  | 22/1627  |
| 319189                            | <i>Hist2h2bb</i>     | SVVYKVL     | Kb 8-mer         | 27        | 46   | 1/237    |
| 382522                            | <i>Hist3h2bb</i>     | VNDIFERI    | Kb 8-mer         | 18        | 1748 | 43/293   |
| 15368                             | <i>Hmox1</i>         | IQAENAEFM   | Db 9-mer         | 27        | 308  | 3/561    |
| 15387                             | <i>Hnrpk</i>         | DQIQNAQYL   | Db 9-mer         | 28        | 52   | 1/909    |
| 23918                             | <i>Impdh2</i>        | GGIQNVGHI   | Db 9-mer         | 26        | 291  | 5/1011   |

|        |                   |               |           |    |       |          |
|--------|-------------------|---------------|-----------|----|-------|----------|
| 16867  | <i>Lhcgr</i>      | SILLNAVAF     | Db 10-mer | 22 | 2815  | 564/1383 |
| 545270 | <i>LOC545270</i>  | YALYNNWEHM    | Db 10-mer | 28 | 45    | 2/165    |
| 72416  | <i>Lrpprc</i>     | AAIENIEHL     | Db 9-mer  | 32 | 64    | 4/2595   |
| 99470  | <i>Magi3</i>      | SGLTNRDTL     | Db 9-mer  | 31 | 14    | 1/2235   |
| 56692  | <i>Map2k1ip1</i>  | QVQVFNRL      | Kb 8-mer  | 20 | 368   | 14/233   |
| 26413  | <i>Mapk1</i>      | VGPRYTNL      | Kb 8-mer  | 25 | 12    | 2/701    |
| 17168  | <i>Mare</i>       | SAVKNLQQL     | Db 9-mer  | 31 | 85    | 1/1121   |
| 17169  | <i>Mark3</i>      | TSIAFKNI      | Kb 8-mer  | 19 | 88    | 5/1473   |
| 17427  | <i>Mns1</i>       | KIIEFANI      | Kb 8-mer  | 20 | 20    | 1/967    |
| 17863  | <i>Myb</i>        | NAIKNHWNSTM   | Db 11-mer | 17 | 309   | 2/1255   |
| 67938  | <i>Mylc2b</i>     | SLGKNPTDAYL   | Db 11-mer | 16 | 13242 | 31/327   |
| 74838  | <i>Narg1</i>      | SAVENLNEM     | Db 9-mer  | 33 | 94    | 2/1713   |
| 17992  | <i>Ndufa4</i>     | VNVVDSKLL     | Kb 8-mer  | 24 | 40    | 1/149    |
| 227197 | <i>Ndufs1</i>     | AKLVNQEVL     | Db 9-mer  | 28 | 175   | 1/1437   |
| 64652  | <i>Nisch</i>      | TNQDFIQRL     | Kb 9-mer  | 14 | 358   | 98/3171  |
| 66394  | <i>Nosip</i>      | TSVRFTQL      | Kb 8-mer  | 24 | 33    | 1/447    |
| 18145  | <i>Npc1</i>       | VAVWNKVDI     | Db 9-mer  | 29 | 73    | 3/2537   |
| 101706 | <i>Numa1</i>      | VSILNRQVL     | Db 9-mer  | 26 | 14    | 1/4171   |
| 69482  | <i>Nup35</i>      | AQYGNILKHVM   | Db 11-mer | 20 | 1543  | 42/633   |
| 18519  | <i>Pcaf</i>       | VQYKFSHL      | Kb 8-mer  | 28 | 4     | 1/1611   |
| 14827  | <i>Pdia3</i>      | FAHTNIESL     | Db 9-mer  | 29 | 19    | 1/993    |
| 23986  | <i>Peci</i>       | SSYTFPKM      | Kb 8-mer  | 25 | 8     | 1/561    |
| 75725  | <i>Phf14</i>      | VNYFFERNM     | Kb 9-mer  | 18 | 18    | 6/1603   |
| 236539 | <i>Phgdh</i>      | TGVVNAQAL     | Db 9-mer  | 29 | 203   | 2/1049   |
| 233489 | <i>Picalm</i>     | NGVINAAMF     | Db 9-mer  | 26 | 192   | 4/1303   |
| 233489 | <i>Picalm</i>     | VAFDFTKV      | Kb 8-mer  | 20 | 45    | 6/1305   |
| 224938 | <i>Pja2</i>       | SSVQNGIML     | Db 9-mer  | 26 | 15    | 1/1397   |
| 59047  | <i>Pnkp</i>       | YVHVNRDTL     | Db 9-mer  | 25 | 9     | 1/1027   |
| 231329 | <i>Polr2b</i>     | IGPTYQRL      | Kb 9-mer  | 20 | 23    | 15/2319  |
| 218832 | <i>Polr3a</i>     | VTIQNSELM     | Db 9-mer  | 27 | 503   | 13/2763  |
| 19015  | <i>Ppard</i>      | ASIVNKDGL     | Db 9-mer  | 30 | 117   | 3/863    |
| 170826 | <i>Ppargc1b</i>   | LSVRNGATL     | Db 9-mer  | 27 | 41    | 1/2011   |
| 54397  | <i>Ppt2</i>       | SSYSFRHL      | Kb 8-mer  | 29 | 4     | 1/589    |
| 106042 | <i>Prickle1</i>   | LNKFFPGL      | Kb 8-mer  | 29 | 5     | 1/1509   |
| 23992  | <i>Prkra</i>      | ISPENHISL     | Db 9-mer  | 28 | 109   | 2/609    |
| 16913  | <i>Psmb8</i>      | GGVWNYMHM     | Db 9-mer  | 27 | 135   | 2/535    |
| 15170  | <i>Ptpn6</i>      | AQYKFIYV      | Kb 8-mer  | 25 | 23    | 1/1039   |
| 78697  | <i>Pus7</i>       | TSIKNQTL      | Db 9-mer  | 28 | 159   | 2/1303   |
| 110816 | <i>Pwp2</i>       | FAYRFSNL      | Kb 8-mer  | 30 | 2     | 1/1823   |
| 70314  | <i>Rabep2</i>     | AQVQNSEQL     | Db 9-mer  | 28 | 382   | 2/1005   |
| 74734  | <i>Rhoh</i>       | YSVANHNSFL    | Db 10-mer | 26 | 767   | 7/365    |
| 68477  | <i>Rmnd5a</i>     | WAVSNREML     | Db 9-mer  | 27 | 158   | 1/765    |
| 22644  | <i>Rnf103</i>     | KTIYNVEHL     | Db 9-mer  | 26 | 308   | 4/1349   |
| 66480  | <i>Rpl15</i>      | STYKFFEV      | Kb 8-mer  | 24 | 51    | 3/393    |
| 19942  | <i>Rpl27</i>      | KTVVNDKDF     | Db 9-mer  | 25 | 54    | 1/255    |
| 67891  | <i>Rpl4</i>       | VNFVHTNL      | Kb 8-mer  | 13 | 51    | 1/823    |
| 267019 | <i>Rps15a</i>     | VIVRFLTV      | Kb 8-mer  | 19 | 33    | 1/245    |
| 267019 | <i>Rps15a</i>     | VIVRFLTVM     | Kb 9-mer  | 19 | 33    | 9/245    |
| 20133  | <i>Rrm1</i>       | FQIVNPHLL     | Db 9-mer  | 28 | 71    | 2/1567   |
| 20133  | <i>Rrm1</i>       | YGIRNSLLI     | Db 9-mer  | 26 | 452   | 7/1567   |
| 269254 | <i>Setx</i>       | SQLENKTII     | Db 9-mer  | 28 | 61    | 2/5275   |
| 81898  | <i>Sf3b1</i>      | KAIVNVIGM     | Db 9-mer  | 28 | 70    | 2/2591   |
| 170755 | <i>Sgk3</i>       | YSIVNASVL     | Db 9-mer  | 28 | 6     | 1/975    |
| 20425  | <i>Shmt1</i>      | RNLDYARL      | Kb 8-mer  | 23 | 22    | 2/941    |
| 63959  | <i>Slc29a1</i>    | SAIFNNVMTL    | Db 10-mer | 29 | 886   | 16/899   |
| 20527  | <i>Slc2a3</i>     | TGVINAPETI    | Db 10-mer | 30 | 2873  | 57/969   |
| 20586  | <i>Smarca4</i>    | TQVLNTHYV     | Db 9-mer  | 22 | 94    | 3/3211   |
| 20740  | <i>Spna2</i>      | KALINADEL     | Db 9-mer  | 31 | 19    | 1/4817   |
| 20815  | <i>Srpk1</i>      | ISGVNGTHI     | Db 9-mer  | 28 | 55    | 1/1279   |
| 67437  | <i>Ssr3</i>       | VAFAYKNV      | Kb 8-mer  | 18 | 18    | 1/355    |
| 20448  | <i>St6galnac4</i> | QVYFTFERM     | Kb 9-mer  | 17 | 137   | 13/589   |
| 20848  | <i>Stat3</i>      | ATLVFHNL      | Kb 8-mer  | 22 | 23    | 1/1429   |
| 58523  | <i>Statip1</i>    | SAPRNFVENF    | Db 10-mer | 30 | 315   | 11/1645  |
| 16430  | <i>Stt3a</i>      | AVLSFSTRL     | Kb 9-mer  | 13 | 154   | 66/1695  |
| 21687  | <i>Tek</i>        | NDIKFQDV      | Kb 8-mer  | 18 | 4583  | 645/2231 |
| 22042  | <i>Tfrc</i>       | KAFTYINL      | Kb 8-mer  | 23 | 11    | 2/1371   |
| 21894  | <i>Tln1</i>       | SVMENSKVLGEAM | Db 13-mer | 23 | 60    | 5/5065   |
| 70549  | <i>Tln2</i>       | SVMENSKVLGESM | Db 13-mer | 23 | 60    | 5/5069   |
| 66074  | <i>Tmem167</i>    | SAIFNFQSL     | Db 9-mer  | 30 | 48    | 1/127    |
| 67878  | <i>Tmem33</i>     | QSIAFISRL     | Kb 9-mer  | 13 | 75    | 28/479   |
| 21916  | <i>Tmod1</i>      | SSIVNKEGL     | Db 9-mer  | 30 | 228   | 3/701    |
| 217351 | <i>Tnrc6c</i>     | TSPINPQHM     | Db 9-mer  | 28 | 158   | 5/3783   |
| 22142  | <i>Tuba1a</i>     | ERPTYTNL      | Kb 8-mer  | 23 | 1759  | 134/889  |
| 22142  | <i>Tuba1a</i>     | DIERPTYTNL    | Kb 10-mer | 23 | 849   | 134/889  |
| 53382  | <i>Txn1</i>       | FQNVNSVTL     | Db 9-mer  | 28 | 27    | 1/561    |
| 67123  | <i>Ubap1</i>      | KSLSFPKL      | Kb 8-mer  | 22 | 42    | 3/867    |
| 19704  | <i>Upf1</i>       | SGYIYHKL      | Kb 8-mer  | 29 | 18    | 2/2211   |
| 326622 | <i>Upf2</i>       | SAVIFRTL      | Kb 8-mer  | 24 | 57    | 4/2523   |
| 216825 | <i>Usp22</i>      | FAVWNHQTL     | Db 10-mer | 31 | 985   | 7/1033   |
| 230895 | <i>Vps13d</i>     | INIHYTQL      | Kb 8-mer  | 25 | 39    | 10/8753  |
| 80743  | <i>Vps16</i>      | VSFTYRYL      | Kb 8-mer  | 22 | 3     | 1/1663   |
| 233405 | <i>Vps33b</i>     | ASLVNADKL     | Db 9-mer  | 31 | 25    | 1/1217   |

|        |                |           |          |    |     |         |
|--------|----------------|-----------|----------|----|-----|---------|
| 65114  | <i>Vps35</i>   | FSEENHEPL | Db 9-mer | 27 | 33  | 3/1575  |
| 241627 | <i>Wdr76</i>   | FSPTNPAHL | Db 9-mer | 29 | 18  | 1/1031  |
| 103573 | <i>Xpo1</i>    | TILEFSQNM | Kb 9-mer | 14 | 88  | 81/2127 |
| 68090  | <i>Yif1a</i>   | SGYKYVGM  | Kb 8-mer | 25 | 17  | 1/571   |
| 66980  | <i>Zdhhc6</i>  | SVIKFENL  | Kb 8-mer | 25 | 44  | 3/811   |
| 67187  | <i>Zmynd19</i> | ESYSFEARM | Kb 9-mer | 18 | 386 | 2/439   |

MHC Ib-associated peptides

| GeneID | Gene symbol          | Peptides  | Restriction size | Rankpep |
|--------|----------------------|-----------|------------------|---------|
| 77877  | <i>6030458C11Rik</i> | KVLDVLHSL | Qa2 9-mer        | 228     |
| 213895 | <i>Bms1l</i>         | YQNQEIHNL | Qa2 9-mer        | 131     |
| 12181  | <i>Bop1</i>          | EQVALVHRL | Qa2 9-mer        | 199     |
| 224171 | <i>C330027C09Rik</i> | AQNDIEHLF | Qa2 9-mer        | 155     |
| 12465  | <i>Cct5</i>          | SMMDVDHQI | Qa2 9-mer        | 223     |
| 214901 | <i>Chtf18</i>        | QLSDTLHSL | Qa2 9-mer        | 184     |
| 80986  | <i>Ckap2</i>         | TLNDLIHNI | Qa2 9-mer        | 192     |
| 12847  | <i>Copa</i>          | SQLPVDHIL | Qa2 9-mer        | 196     |
| 66366  | <i>Ergic3</i>        | QQLDVEHNL | Qa2 9-mer        | 212     |
| 108655 | <i>Foxp1</i>         | QQLQQHLL  | Qa2 9-mer        | 148     |
| 15016  | <i>H2-Q5</i>         | AMAPRLLL  | Qa1 9-mer        |         |
| 212307 | <i>Mapre2</i>        | QLNEQVHSL | Qa2 9-mer        | 176     |
| 68979  | <i>Nol11</i>         | TQLIQTHVL | Qa2 9-mer        | 150     |
| 20115  | <i>Rps7</i>          | QQNNVEHKV | Qa2 9-mer        | 180     |

---

**Table S3.** Computed MHC binding affinity of MHC I-associated peptides eluted from primary mouse thymocytes

| <b>MHC Ia-associated peptides</b> |                      |             |                  |      |           |
|-----------------------------------|----------------------|-------------|------------------|------|-----------|
| GeneID                            | Gene symbol          | Peptides    | Restriction size | smm  | SYFPEITHI |
| 68295                             | <i>0610011L14Rik</i> | ISILYHQL    | Kb 8-mer         | 20   | 24        |
| 68523                             | <i>1110019N10Rik</i> | AALENTLL    | Db 9-mer         | 327  | 30        |
| 72368                             | <i>2310045N01Rik</i> | SSVYFRSV    | Kb 8-mer         | 51   | 19        |
| 75425                             | <i>2610036D13Rik</i> | QTVENVEHL   | Db 9-mer         | 635  | 27        |
| 72722                             | <i>2810405J04Rik</i> | ASPEFTKL    | Kb 8-mer         | 60   | 26        |
| 72747                             | <i>2810439F02Rik</i> | SGYDFENRL   | Kb 9-mer         | 19   | 21        |
| 67268                             | <i>2900073G15Rik</i> | SMGKNPTDEYL | Db 11-mer        | 344  | 20        |
| 67392                             | <i>4833420G17Rik</i> | FVISNYREQL  | Db 11-mer        | 1238 | 26        |
| 218989                            | <i>6720456H20Rik</i> | TGIRNLEWL   | Db 9-mer         | 574  | 30        |
| 11307                             | <i>Abcg1</i>         | VNIEFKDL    | Kb 8-mer         | 107  | 23        |
| 66713                             | <i>Actr2</i>         | YAGSNFPEHI  | Db 10-mer        | 386  | 29        |
| 67019                             | <i>Actr6</i>         | SGYSFTHI    | Kb 8-mer         | 39   | 25        |
| 57869                             | <i>Adck2</i>         | SGPTYIKL    | Kb 8-mer         | 78   | 25        |
| 81702                             | <i>Ankrd17</i>       | ASVLNVNHI   | Db 9-mer         | 87   | 27        |
| 329154                            | <i>Ankrd44</i>       | ASVINGHTL   | Db 9-mer         | 60   | 28        |
| 73341                             | <i>Arhgef6</i>       | AIIAFKTL    | Kb 8-mer         | 45   | 24        |
| 54208                             | <i>Arl6ip1</i>       | IILKYIGM    | Kb 8-mer         | 11   | 20        |
| 192195                            | <i>Ash11</i>         | VGLINKDSV   | Db 9-mer         | 412  | 24        |
| 11906                             | <i>Atbf1</i>         | VAIGNPVHL   | Db 9-mer         | 292  | 28        |
| Q9JJK8                            | <i>Atr</i>           | FQALNAEKL   | Db 9-mer         | 208  | 26        |
| 54138                             | <i>Atxn10</i>        | NSIRNLDTI   | Db 9-mer         | 13   | 31        |
| 328099                            | <i>AU021838</i>      | VSYLFSHV    | Kb 8-mer         | 3    | 24        |
| 213550                            | <i>AV340375</i>      | FSNKNLEEL   | Db 9-mer         | 53   | 31        |
| 235461                            | <i>B230380D07Rik</i> | VNVRFTGV    | Kb 8-mer         | 36   | 19        |
| 224727                            | <i>Bot3</i>          | SIAAFIQL    | Kb 9-mer         | 199  | 14        |
| 66165                             | <i>Bccip</i>         | KAPVNTAEL   | Db 9-mer         | 43   | 31        |
| 107976                            | <i>Bre</i>           | ATQVYPKL    | Kb 8-mer         | 67   | 22        |
| 26885                             | <i>Casp8ap2</i>      | VTVLNVDHL   | Db 9-mer         | 30   | 26        |
| 76041                             | <i>Ccdc125</i>       | NAVLNQRYL   | Db 9-mer         | 32   | 27        |
| 77048                             | <i>Ccdc41</i>        | AQVENVQRI   | Db 9-mer         | 498  | 29        |
| 12445                             | <i>Ccnd3</i>         | AAVIAHDFL   | Db 9-mer         | 46   | 20        |
| 12449                             | <i>Ccnf</i>          | SQAVNKQQI   | Db 9-mer         | 588  | 26        |
| 12450                             | <i>Ccng1</i>         | TAFQFLQL    | Kb 8-mer         | 80   | 22        |
| 12501                             | <i>Cd3e</i>          | YSGLNQRAV   | Db 9-mer         | 406  | 19        |
| 26364                             | <i>Cd97</i>          | KLLSNINSVF  | Db 10-mer        | 9292 | 23        |
| 12576                             | <i>Cdkn1b</i>        | FGPVNHEEL   | Db 9-mer         | 77   | 33        |
| 229841                            | <i>Cenpe</i>         | SALQNAESDRL | Db 12-mer        | 76   | 22        |
| 216859                            | <i>Centb1</i>        | INQIYEARV   | Kb 9-mer         | 268  | 13        |
| 12649                             | <i>Chek1</i>         | TGPSNVDKL   | Db 9-mer         | 784  | 29        |
| 243764                            | <i>Chrm2</i>         | TVIGYWPL    | Kb 8-mer         | 196  | 21        |
| 70349                             | <i>Copb1</i>         | IALRYVAL    | Kb 8-mer         | 22   | 23        |
| 67876                             | <i>Coq10b</i>        | ISFEFRSL    | Kb 8-mer         | 2    | 24        |
| 68975                             | <i>Crsp8</i>         | SGLLNQOSL   | Db 9-mer         | 118  | 28        |
| 71745                             | <i>Cul2</i>          | VINSFVHV    | Kb 8-mer         | 527  | 17        |
| 12767                             | <i>Cxcr4</i>         | WFQFOHI     | Kb 8-mer         | 56   | 16        |
| 52635                             | <i>D12Erttd551e</i>  | RQLENGTTL   | Db 9-mer         | 33   | 28        |
| 218978                            | <i>D14Erttd436e</i>  | SQHVNLDQL   | Db 9-mer         | 61   | 29        |
| 71919                             | <i>D15Erttd682e</i>  | TNVLFNHL    | Kb 8-mer         | 169  | 21        |
| 69601                             | <i>Dab2ip</i>        | VSPTNPTKL   | Db 9-mer         | 98   | 29        |
| 67755                             | <i>Ddx47</i>         | KTLFASATM   | Kb 9-mer         | 33   | 11        |
| 13207                             | <i>Ddx5</i>          | NQAINPKLLQL | Db 11-mer        | 4239 | 22        |
| 13209                             | <i>Ddx6</i>          | INFDFPKL    | Kb 8-mer         | 7    | 24        |
| 76131                             | <i>Depdc1a</i>       | FSQENTEKI   | Db 9-mer         | 231  | 28        |
| 13433                             | <i>Dnmt1</i>         | LSLENGHTL   | Db 10-mer        | 758  | 28        |
| 94176                             | <i>Dock2</i>         | SMVQNRVFL   | Db 9-mer         | 7    | 29        |
| 233115                            | <i>Dpy19l3</i>       | SVAFHNL     | Kb 8-mer         | 44   | 22        |
| 13424                             | <i>Dync1h1</i>       | ASYEFVQRL   | Kb 9-mer         | 18   | 20        |
| 13669                             | <i>Eif3s10</i>       | QSIEFSRL    | Kb 8-mer         | 28   | 24        |
| 73830                             | <i>Eif3s12</i>       | VGITYQHI    | Kb 8-mer         | 100  | 18        |
| 170439                            | <i>Elovl6</i>        | KSFLFSAL    | Kb 8-mer         | 10   | 22        |
| 10436                             | <i>EMG1</i>          | VSVEYTEKM   | Kb 9-mer         | 58   | 13        |
| 13819                             | <i>Epas1</i>         | SNYLFTKL    | Kb 8-mer         | 10   | 30        |
| 212377                            | <i>F730047E07Rik</i> | VGVTYRTL    | Kb 8-mer         | 28   | 23        |
| 107035                            | <i>Fbxo38</i>        | SAFSFRTL    | Kb 8-mer         | 22   | 24        |
| 14137                             | <i>Fdft1</i>         | ISLEFRNL    | Kb 8-mer         | 3    | 25        |
| 57778                             | <i>Fmn11</i>         | LQYEFTHL    | Kb 8-mer         | 19   | 29        |
| 22379                             | <i>Fmn13</i>         | LQYEFTKL    | Kb 8-mer         | 25   | 30        |
| 14359                             | <i>Fxr1h</i>         | EIVTFERL    | Kb 8-mer         | 464  | 22        |
| 14790                             | <i>Grcc10</i>        | SAPENAVRM   | Db 9-mer         | 165  | 33        |
| 68153                             | <i>Gtf2e2</i>        | SGYKFGVL    | Kb 8-mer         | 18   | 29        |
| 69237                             | <i>Gtpbp4</i>        | QILSDFPKL   | Kb 9-mer         | 231  | 23        |
| 14976                             | <i>H2-Ke2</i>        | SNVVFKLL    | Kb 9-mer         | 145  | 22        |
| 15019                             | <i>H2-Q8</i>         | FAYEGRDYI   | Db 9-mer         | 12   | 21        |
| 15201                             | <i>Hells</i>         | KVLVFSQM    | Kb 8-mer         | 254  | 18        |
| 15257                             | <i>Hipk1</i>         | SLLTNHVTL   | Db 9-mer         | 167  | 28        |
| 319189                            | <i>Hist2h2bb</i>     | SVVYKVL     | Kb 8-mer         | 46   | 27        |
| 98758                             | <i>Hnrpf</i>         | FSPLNPVRV   | Db 9-mer         | 127  | 25        |

|        |                |             |           |      |    |
|--------|----------------|-------------|-----------|------|----|
| 15441  | <i>Hp1bp3</i>  | VSQYYPKL    | Kb 8-mer  | 29   | 22 |
| 16145  | <i>Igtp</i>    | IVAENTKTSL  | Db 10-mer | 3059 | 24 |
| 23918  | <i>Impdh2</i>  | GGIQNVGHI   | Db 9-mer  | 291  | 26 |
| 16329  | <i>Inpp1</i>   | YMGNTIHS    | Db 9-mer  | 84   | 25 |
| 76582  | <i>Ipo11</i>   | TIILFTKV    | Kb 8-mer  | 95   | 20 |
| 338523 | <i>Jhdm1d</i>  | SSIQNGKYTL  | Db 10-mer | 273  | 29 |
| 16211  | <i>Kpnb1</i>   | AALQNLVKI   | Db 9-mer  | 77   | 31 |
| 110308 | <i>Krt5</i>    | AAYMNKVEL   | Db 9-mer  | 63   | 28 |
| 110310 | <i>Krt7</i>    | AAYTNKVEL   | Db 9-mer  | 66   | 28 |
| 72416  | <i>Lrpprc</i>  | AAIENIEHL   | Db 9-mer  | 64   | 32 |
| 26413  | <i>Mapk1</i>   | VGPRYTNL    | Kb 8-mer  | 12   | 25 |
| 17168  | <i>Mare</i>    | SAVKNLQQL   | Db 9-mer  | 85   | 31 |
| 13728  | <i>Mark2</i>   | ASIQNGKDSL  | Db 10-mer | 1344 | 30 |
| 217615 | <i>Mgea6</i>   | RNQVYTQL    | Kb 8-mer  | 224  | 24 |
| 67014  | <i>Mina</i>    | VVYIYHSL    | Kb 8-mer  | 9    | 26 |
| 17427  | <i>Mns1</i>    | KIIEFANI    | Kb 8-mer  | 20   | 20 |
| 121022 | <i>Mrps6</i>   | SAVENILEHL  | Db 10-mer | 178  | 32 |
| 219135 | <i>Mtmr6</i>   | VGIENIHVM   | Db 9-mer  | 150  | 27 |
| 17886  | <i>Myh9</i>    | RVAEFTTNL   | Kb 9-mer  | 228  | 14 |
| 67938  | <i>Mylc2b</i>  | SLGKNPTDAYL | Db 11-mer | 344  | 16 |
| 67608  | <i>Narf</i>    | AAYGFRNI    | Kb 8-mer  | 32   | 26 |
| 17992  | <i>Ndufa4</i>  | VNVDYSKL    | Kb 8-mer  | 40   | 24 |
| 227197 | <i>Ndufs1</i>  | AKLVNQEV    | Db 9-mer  | 175  | 28 |
| 18034  | <i>Nfkb2</i>   | AALQNLQQL   | Db 9-mer  | 98   | 32 |
| 64652  | <i>Nisch</i>   | TNQDFIQR    | Kb 9-mer  | 358  | 14 |
| 97895  | <i>Nlrp4f</i>  | TPVKNIDTV   | Db 9-mer  | 509  | 24 |
| 68979  | <i>Nol11</i>   | IAVSFREL    | Kb 8-mer  | 48   | 23 |
| 211548 | <i>Nomo1</i>   | SSLVNKEDV   | Db 9-mer  | 99   | 26 |
| 66394  | <i>Nosip</i>   | TSVRFTQL    | Kb 8-mer  | 33   | 24 |
| 18145  | <i>Npc1</i>    | VAVWNKV     | Db 9-mer  | 73   | 29 |
| 101706 | <i>Numa1</i>   | VSILNRQVL   | Db 9-mer  | 14   | 26 |
| 70699  | <i>Nup205</i>  | VNNEFEKL    | Kb 8-mer  | 1138 | 24 |
| 66923  | <i>Pbrm1</i>   | SQVYNDAHI   | Db 9-mer  | 111  | 26 |
| 18538  | <i>Pcna</i>    | RAEDNADTLAL | Db 11-mer | 59   | 27 |
| 56426  | <i>Pcd10</i>   | ILQTFKTV    | Kb 9-mer  | 5    | 18 |
| 207728 | <i>Pde2a</i>   | IKNENQEV    | Db 9-mer  | 1260 | 24 |
| 23986  | <i>Peci</i>    | SSYTFPKM    | Kb 8-mer  | 8    | 25 |
| 73739  | <i>Pgea1</i>   | ASLSNLHSL   | Db 9-mer  | 218  | 30 |
| 233489 | <i>Picalm</i>  | VAFDFTKV    | Kb 8-mer  | 45   | 20 |
| 83490  | <i>Pik3ap1</i> | YGLKNLTAL   | Db 9-mer  | 40   | 29 |
| 18950  | <i>Pnp</i>     | SLITNKWVM   | Db 9-mer  | 104  | 26 |
| 231329 | <i>Polr2b</i>  | IGPTYQRL    | Kb 9-mer  | 23   | 20 |
| 66385  | <i>Ppp1r7</i>  | RAIENIDTL   | Db 9-mer  | 7    | 30 |
| 51792  | <i>Ppp2r1a</i> | IIPMFSNL    | Kb 8-mer  | 4    | 25 |
| 73699  | <i>Ppp2r1b</i> | VADKFS      | Kb 8-mer  | 375  | 23 |
| 214572 | <i>Prmt7</i>   | VIVEFRDL    | Kb 8-mer  | 28   | 23 |
| 19167  | <i>Psma3</i>   | KAVENSSTAI  | Db 10-mer | 517  | 30 |
| 16913  | <i>Psmb8</i>   | GGVWNMYHM   | Db 9-mer  | 135  | 27 |
| 15170  | <i>Ptpn6</i>   | AQYKFIYV    | Kb 8-mer  | 23   | 25 |
| 19696  | <i>Rel</i>     | TTLIFQKL    | Kb 8-mer  | 58   | 21 |
| 26374  | <i>Rfwd2</i>   | YVVDNIDHL   | Db 9-mer  | 156  | 25 |
| 74734  | <i>Rhoh</i>    | YSVANHNSFL  | Db 10-mer | 767  | 26 |
| 68477  | <i>Rmnd5a</i>  | WAVSNREML   | Db 9-mer  | 158  | 27 |
| 20054  | <i>Rps15</i>   | VGVYNGKTF   | Db 9-mer  | 3132 | 25 |
| 267019 | <i>Rps15a</i>  | ISPRFDVQL   | Kb 9-mer  | 172  | 14 |
| 267019 | <i>Rps15a</i>  | VIVRFLTV    | Kb 8-mer  | 33   | 19 |
| 20115  | <i>Rps7</i>    | VNFEFPEF    | Kb 8-mer  | 24   | 12 |
| 20133  | <i>Rrm1</i>    | FQIVNPHLL   | Db 9-mer  | 71   | 28 |
| 20133  | <i>Rrm1</i>    | YGIRNSLLI   | Db 9-mer  | 452  | 26 |
| 235623 | <i>Scap</i>    | SGYDFSRL    | Kb 8-mer  | 5    | 30 |
| 13722  | <i>Scye1</i>   | SGLVNHVPL   | Db 9-mer  | 59   | 29 |
| 20338  | <i>Sel1l</i>   | QALKYFNL    | Kb 8-mer  | 171  | 23 |
| 20393  | <i>Sgk</i>     | STLTYSRM    | Kb 8-mer  | 38   | 18 |
| 20740  | <i>Spna2</i>   | KALINADEL   | Db 9-mer  | 19   | 31 |
| 20815  | <i>Srpk1</i>   | ISGVNGTHI   | Db 9-mer  | 55   | 28 |
| 20443  | <i>St3gal4</i> | GAVKNLTYF   | Db 9-mer  | 81   | 30 |
| 20848  | <i>Stat3</i>   | ATLVFHNL    | Kb 8-mer  | 23   | 22 |
| 71728  | <i>Stk11ip</i> | SALRFLNL    | Kb 8-mer  | 23   | 24 |
| 16430  | <i>Stt3a</i>   | AVLSFSTRL   | Kb 9-mer  | 154  | 13 |
| 108143 | <i>Taf9</i>    | SGLKYVNV    | Kb 8-mer  | 45   | 20 |
| 216198 | <i>Tcp11l2</i> | KATTNIVEM   | Db 9-mer  | 225  | 27 |
| 217353 | <i>Tmc6</i>    | ASYLFRGL    | Kb 8-mer  | 3    | 29 |
| 67511  | <i>Tmed9</i>   | VIGNYRTQL   | Kb 9-mer  | 271  | 14 |
| 72759  | <i>Tmem135</i> | KGFTFSAL    | Kb 8-mer  | 23   | 22 |
| 66074  | <i>Tmem167</i> | AIFNFQSL    | Kb 8-mer  | 8    | 22 |
| 67878  | <i>Tmem33</i>  | QSIAFISRL   | Kb 9-mer  | 75   | 13 |
| 21916  | <i>Tmod1</i>   | SSIVNKEGL   | Db 9-mer  | 228  | 30 |
| 22057  | <i>Tob1</i>    | ISYLYNKL    | Kb 8-mer  | 4    | 29 |
| 21990  | <i>Tph1</i>    | FSENEVGG    | Db 10-mer | 728  | 28 |
| 21990  | <i>Tph1</i>    | WGTFREL     | Kb 8-mer  | 309  | 22 |
| 12751  | <i>Tpp1</i>    | IQRVNTFEM   | Db 9-mer  | 100  | 25 |
| 100683 | <i>Trrap</i>   | QDPVFQKL    | Kb 8-mer  | 885  | 22 |



|        |               |            |           |     |    |
|--------|---------------|------------|-----------|-----|----|
| 73710  | <i>Tubb2b</i> | VNMVFPRL   | Kb 9-mer  | 252 | 20 |
| 56085  | <i>Ubqln1</i> | RALSNLESI  | Db 9-mer  | 87  | 30 |
| 224826 | <i>Ubr2</i>   | VAYKFPPELL | Kb 9-mer  | 6   | 28 |
| 59025  | <i>Usp14</i>  | VKYLFTGL   | Kb 8-mer  | 20  | 27 |
| 216825 | <i>Usp22</i>  | FAVWNHOGTL | Db 10-mer | 985 | 31 |
| 271564 | <i>Vps13a</i> | VSIQFYHL   | Kb 8-mer  | 3   | 22 |
| 230895 | <i>Vps13d</i> | INIHYTQL   | Kb 8-mer  | 39  | 25 |
| 80743  | <i>Vps16</i>  | VSFYRYL    | Kb 8-mer  | 3   | 22 |
| 77573  | <i>Vps33a</i> | GSLANHTSI  | Db 9-mer  | 161 | 27 |
| 233405 | <i>Vps33b</i> | ASLVNADKL  | Db 9-mer  | 25  | 31 |
| 65114  | <i>Vps35</i>  | FSEENHEPL  | Db 9-mer  | 33  | 27 |
| 22375  | <i>Wars</i>   | YTVENAKDII | Db 10-mer | 492 | 26 |
| 69544  | <i>Wdr5b</i>  | AALENDKTI  | Db 9-mer  | 56  | 31 |
| 74781  | <i>Wipi2</i>  | SGYKFFSL   | Kb 8-mer  | 14  | 29 |
| 68090  | <i>Yif1a</i>  | SGYKYVGM   | Kb 8-mer  | 17  | 25 |
| 66980  | <i>Zdhhc6</i> | SVIKFENL   | Kb 8-mer  | 44  | 25 |

MHC Ib-associated peptides

| GeneID | Gene symbol          | Peptides  | Restriction size | Rankpep |
|--------|----------------------|-----------|------------------|---------|
| 319236 | <i>9230105E10Rik</i> | FISDVEHQL | Qa2 9-mer        | 181     |
| 12014  | <i>Bach2</i>         | EQLFEIHDI | Qa2 9-mer        | 183     |
| 224171 | <i>C330027C09Rik</i> | AQNDIEHLF | Qa2 9-mer        | 155     |
| 75565  | <i>Ccdc101</i>       | ELLTELHQL | Qa2 9-mer        | 198     |
| 13204  | <i>Dhx15</i>         | TLLNVYHAF | Qa2 9-mer        | 215     |
| 66366  | <i>Ergic3</i>        | QQLDVEHNL | Qa2 9-mer        | 212     |
| 108655 | <i>Foxp1</i>         | QQLQQHLL  | Qa2 9-mer        | 148     |
| 15016  | <i>H2-Q5</i>         | AMAPRTLLL | Qa1 9-mer        |         |
| 212307 | <i>Mapre2</i>        | QLNEQVHSL | Qa2 9-mer        | 176     |
| 68979  | <i>Nol11</i>         | TQLIQTHVL | Qa2 9-mer        | 150     |
| 69608  | <i>Sec24d</i>        | ESQSVIHNL | Qa2 9-mer        | 185     |
| 319565 | <i>Syne2</i>         | DLIQTIHEL | Qa2 9-mer        | 213     |
| 50875  | <i>Tmod3</i>         | AAILGMHNL | Qa2 9-mer        | 134     |
| 320938 | <i>Tnpo3</i>         | GLLEIAHSL | Qa2 9-mer        | 237     |

---

**Table S4.** Computed MHC binding affinity of MHC I-associated peptides eluted from in vivo grown EL4 cells

| <b>MHC Ia-associated peptides</b> |                      |             |                  |      |           |
|-----------------------------------|----------------------|-------------|------------------|------|-----------|
| GeneID                            | Gene symbol          | Peptides    | Restriction size | smm  | SYFPEITHI |
| 68295                             | <i>O610011L14Rik</i> | ISILYHQL    | Kb 8-mer         | 20   | 24        |
| 68523                             | <i>1110019N10Rik</i> | AALENTHLL   | Db 9-mer         | 327  | 30        |
| 72368                             | <i>2310045N01Rik</i> | SSVYFRSV    | Kb 8-mer         | 51   | 19        |
| 75425                             | <i>2610036D13Rik</i> | QTVENVEHL   | Db 9-mer         | 635  | 27        |
| 72722                             | <i>2810405J04Rik</i> | ASPEFTKL    | Kb 8-mer         | 60   | 26        |
| 72747                             | <i>2810439F02Rik</i> | SGYDFENRL   | Kb 9-mer         | 19   | 21        |
| 67268                             | <i>2900073G15Rik</i> | SMGKNPTDEYL | Db 11-mer        | 344  | 20        |
| 67392                             | <i>4833420G17Rik</i> | FVISNYREQL  | Db 11-mer        | 1238 | 26        |
| 218989                            | <i>6720456H20Rik</i> | TGIRNLEWL   | Db 9-mer         | 574  | 30        |
| 11307                             | <i>Abcg1</i>         | VNIEFKDL    | Kb 8-mer         | 107  | 23        |
| 66713                             | <i>Actr2</i>         | YAGSNFPEHI  | Db 10-mer        | 386  | 29        |
| 67019                             | <i>Actr6</i>         | SGYSFTHI    | Kb 8-mer         | 39   | 25        |
| 57869                             | <i>Adck2</i>         | SGPTYIKL    | Kb 8-mer         | 78   | 25        |
| 81702                             | <i>Ankrd17</i>       | ASVLNVNHI   | Db 9-mer         | 87   | 27        |
| 329154                            | <i>Ankrd44</i>       | ASVINGHTL   | Db 9-mer         | 60   | 28        |
| 75415                             | <i>Arhgap12</i>      | YGLLNVTKI   | Db 9-mer         | 60   | 26        |
| 73341                             | <i>Arhgef6</i>       | AIIAFKTL    | Kb 8-mer         | 45   | 24        |
| 54208                             | <i>Arl6ip1</i>       | IILKYIGM    | Kb 8-mer         | 11   | 20        |
| 192195                            | <i>Ash1l</i>         | VGLINKDSV   | Db 9-mer         | 412  | 24        |
| 11906                             | <i>Atbf1</i>         | VAIGNPVHL   | Db 9-mer         | 292  | 28        |
| Q9JJK8                            | <i>Atr</i>           | FOALNAEKL   | Db 9-mer         | 208  | 26        |
| 54138                             | <i>Atxn10</i>        | NSIRNLDTI   | Db 9-mer         | 13   | 31        |
| 328099                            | <i>AU021838</i>      | VSYLFSHV    | Kb 8-mer         | 3    | 24        |
| 213550                            | <i>AV340375</i>      | FSNKNLEEL   | Db 9-mer         | 53   | 31        |
| 235461                            | <i>B230380D07Rik</i> | VNVRFTGV    | Kb 8-mer         | 36   | 19        |
| 224727                            | <i>Bat3</i>          | SIAAFIQL    | Kb 9-mer         | 199  | 14        |
| 66165                             | <i>Bccip</i>         | KAPVNTAEL   | Db 9-mer         | 43   | 31        |
| 107976                            | <i>Bre</i>           | ATQVYPKL    | Kb 8-mer         | 67   | 22        |
| 26885                             | <i>Casp8ap2</i>      | VTVLNVDHL   | Db 9-mer         | 30   | 26        |
| 76041                             | <i>Ccdc125</i>       | NAVLNQRYL   | Db 9-mer         | 32   | 27        |
| 77048                             | <i>Ccdc41</i>        | AQVENVQRI   | Db 9-mer         | 498  | 29        |
| 12445                             | <i>Ccnd3</i>         | AAVIAHDFL   | Db 9-mer         | 46   | 20        |
| 12449                             | <i>Ccnf</i>          | SQAVNKQOI   | Db 9-mer         | 588  | 26        |
| 12450                             | <i>Ccng1</i>         | TAFQFLQL    | Kb 8-mer         | 80   | 22        |
| 12501                             | <i>Cd3e</i>          | YSGLNQRAV   | Db 9-mer         | 406  | 19        |
| 26364                             | <i>Cd97</i>          | KLLSNINSVF  | Db 10-mer        | 9292 | 23        |
| 12576                             | <i>Cdkn1b</i>        | FGPVNHEEL   | Db 9-mer         | 77   | 33        |
| 229841                            | <i>Cenpe</i>         | SALQNAESDRL | Db 12-mer        | 76   | 22        |
| 216859                            | <i>Centb1</i>        | INQIYEARV   | Kb 9-mer         | 268  | 13        |
| 12649                             | <i>Chek1</i>         | TGPSNVDKL   | Db 9-mer         | 784  | 29        |
| 243764                            | <i>Chrm2</i>         | TVIGYWPL    | Kb 8-mer         | 196  | 21        |
| 70349                             | <i>Copb1</i>         | IALRYVAL    | Kb 8-mer         | 22   | 23        |
| 67876                             | <i>Coq10b</i>        | ISFEFRSL    | Kb 8-mer         | 2    | 24        |
| 68975                             | <i>Crsp8</i>         | SGLLNQQSL   | Db 9-mer         | 118  | 28        |
| 71745                             | <i>Cul2</i>          | VINSFVHV    | Kb 8-mer         | 527  | 17        |
| 12767                             | <i>Cxcr4</i>         | VVFQFQHI    | Kb 8-mer         | 56   | 16        |
| 52635                             | <i>D12Erttd551e</i>  | RQLENGTTL   | Db 9-mer         | 33   | 28        |
| 218978                            | <i>D14Erttd436e</i>  | SQHVNLDQL   | Db 9-mer         | 61   | 29        |
| 71919                             | <i>D15Erttd682e</i>  | TNVLFNHL    | Kb 8-mer         | 169  | 21        |
| 69601                             | <i>Dab2ip</i>        | VSPTNPTKL   | Db 9-mer         | 98   | 29        |
| 67755                             | <i>Ddx47</i>         | KTFLFSATM   | Kb 9-mer         | 33   | 11        |
| 13209                             | <i>Ddx6</i>          | INFDFPKL    | Kb 8-mer         | 7    | 24        |
| 76131                             | <i>Depdc1a</i>       | FSQENTEKI   | Db 9-mer         | 231  | 28        |
| 13433                             | <i>Dnmt1</i>         | LSLENGHTL   | Db 10-mer        | 758  | 28        |
| 94176                             | <i>Dock2</i>         | SMVQNRVFL   | Db 9-mer         | 7    | 29        |
| 233115                            | <i>Dpy19l3</i>       | SVAFHNL     | Kb 8-mer         | 44   | 22        |
| 13424                             | <i>Dync1h1</i>       | ASYEFVQRL   | Kb 9-mer         | 18   | 20        |
| 13669                             | <i>Eif3s10</i>       | QSIEFSRL    | Kb 8-mer         | 28   | 24        |
| 73830                             | <i>Eif3s12</i>       | VGITYQHI    | Kb 8-mer         | 100  | 18        |
| 54709                             | <i>Eif3s2</i>        | FGPINSVAF   | Db 9-mer         | 1976 | 26        |
| 170439                            | <i>Elovl6</i>        | KSFLFSAL    | Kb 8-mer         | 10   | 22        |
| 10436                             | <i>EMG1</i>          | VSVEYTEKM   | Kb 9-mer         | 58   | 13        |
| 13819                             | <i>Epas1</i>         | SNYLFKTL    | Kb 8-mer         | 10   | 30        |
| 212377                            | <i>F730047E07Rik</i> | VGVTYRTL    | Kb 8-mer         | 28   | 23        |
| 14104                             | <i>Fasn</i>          | TALENLSTL   | Db 9-mer         | 48   | 33        |
| 107035                            | <i>Fbxo38</i>        | SAFSFRTL    | Kb 8-mer         | 22   | 24        |
| 14137                             | <i>Fdft1</i>         | ISLEFRNL    | Kb 8-mer         | 3    | 25        |
| 57778                             | <i>Fmnl1</i>         | LQYEFTHL    | Kb 8-mer         | 19   | 29        |
| 22379                             | <i>Fmnl3</i>         | LQYEFKTL    | Kb 8-mer         | 25   | 30        |
| 14359                             | <i>Fxr1h</i>         | EIVTFERL    | Kb 8-mer         | 464  | 22        |
| 14790                             | <i>Grcc10</i>        | SAPENAVRM   | Db 9-mer         | 165  | 33        |
| 68153                             | <i>Gtf2e2</i>        | SGYKFGVL    | Kb 8-mer         | 18   | 29        |
| 69237                             | <i>Gtpbp4</i>        | QILSDFFPKL  | Kb 9-mer         | 231  | 23        |
| 14976                             | <i>H2-Ke2</i>        | SNVVFKLL    | Kb 9-mer         | 145  | 22        |
| 15019                             | <i>H2-Q8</i>         | FAYEGRDYI   | Db 9-mer         | 12   | 21        |
| 15201                             | <i>Hells</i>         | KVLVFSQM    | Kb 8-mer         | 254  | 18        |
| 15257                             | <i>Hipk1</i>         | SLLTNHVTL   | Db 9-mer         | 167  | 28        |
| 319189                            | <i>Hist2h2bb</i>     | SVVYKVL     | Kb 8-mer         | 46   | 27        |

|        |                 |             |           |      |    |
|--------|-----------------|-------------|-----------|------|----|
| 20585  | <i>Hltf</i>     | SGFVFTRL    | Kb 8-mer  | 7    | 23 |
| 98758  | <i>Hnrpf</i>    | FSPLNPVRV   | Db 9-mer  | 127  | 25 |
| 15441  | <i>Hp1bp3</i>   | VSQYYPKL    | Kb 8-mer  | 29   | 22 |
| 23918  | <i>Impdh2</i>   | GGIQNVGHI   | Db 9-mer  | 291  | 26 |
| 16329  | <i>Inpp1</i>    | YMGNTIHSL   | Db 9-mer  | 84   | 25 |
| 76582  | <i>Ipo11</i>    | TIILFTKV    | Kb 8-mer  | 95   | 20 |
| 338523 | <i>Jhdm1d</i>   | SSIQNGKYTL  | Db 10-mer | 273  | 29 |
| 16211  | <i>Kpnb1</i>    | AALQNLVKI   | Db 9-mer  | 77   | 31 |
| 76130  | <i>Las1l</i>    | ALVRFVNL    | Kb 8-mer  | 74   | 23 |
| 72416  | <i>Lrpprc</i>   | AAIENIEHL   | Db 9-mer  | 64   | 32 |
| 26413  | <i>Mapk1</i>    | VGPRYTNL    | Kb 8-mer  | 12   | 25 |
| 17168  | <i>Mare</i>     | SAVKNLQQL   | Db 9-mer  | 85   | 31 |
| 13728  | <i>Mark2</i>    | ASIQNGKDSL  | Db 10-mer | 1344 | 30 |
| 217615 | <i>Mgea6</i>    | RNQVYTQL    | Kb 8-mer  | 224  | 24 |
| 67014  | <i>Mina</i>     | VVYIYHSL    | Kb 8-mer  | 9    | 26 |
| 121022 | <i>Mrps6</i>    | SAVENILEHL  | Db 10-mer | 178  | 32 |
| 219135 | <i>Mtmr6</i>    | VGIENIHVM   | Db 9-mer  | 150  | 27 |
| 17886  | <i>Myh9</i>     | RVAEFTNL    | Kb 9-mer  | 228  | 14 |
| 67938  | <i>Mylc2b</i>   | SLGKNPTDAYL | Db 11-mer | 344  | 16 |
| 67608  | <i>Narf</i>     | AAYGFRNI    | Kb 8-mer  | 32   | 26 |
| 67563  | <i>Narf1</i>    | VAYGFRNI    | Kb 8-mer  | 15   | 25 |
| 17992  | <i>Ndufa4</i>   | VNVDYSKL    | Kb 8-mer  | 40   | 24 |
| 227197 | <i>Ndufs1</i>   | AKLVNQEVL   | Db 9-mer  | 175  | 28 |
| 18034  | <i>Nfkb2</i>    | AALQNLEQL   | Db 9-mer  | 98   | 32 |
| 64652  | <i>Nisch</i>    | TNQDFIQL    | Kb 9-mer  | 358  | 14 |
| 97895  | <i>Nlrp4f</i>   | TPVKNIDTV   | Db 9-mer  | 509  | 24 |
| 68979  | <i>Nol11</i>    | IAVSFREL    | Kb 8-mer  | 48   | 23 |
| 211548 | <i>Nomo1</i>    | SSLVNKEDV   | Db 9-mer  | 99   | 26 |
| 66394  | <i>Nosip</i>    | TSVRFTQL    | Kb 8-mer  | 33   | 24 |
| 18145  | <i>Npc1</i>     | VAVVNKVDI   | Db 9-mer  | 73   | 29 |
| 101706 | <i>Numa1</i>    | VSILNRQVL   | Db 9-mer  | 14   | 26 |
| 70699  | <i>Nup205</i>   | VNNEFEKL    | Kb 8-mer  | 1138 | 24 |
| 18813  | <i>Pa2g4</i>    | AQKFFTVL    | Kb 8-mer  | 59   | 23 |
| 66923  | <i>Pbrm1</i>    | SQVYNDAHI   | Db 9-mer  | 111  | 26 |
| 18538  | <i>Pcna</i>     | RAEDNADTLAL | Db 11-mer | 59   | 27 |
| 56426  | <i>Pdcd10</i>   | ILQTFKTV    | Kb 9-mer  | 5    | 18 |
| 207728 | <i>Pde2a</i>    | IKNENQEVI   | Db 9-mer  | 1260 | 24 |
| 23986  | <i>Peci</i>     | SSYTFPKM    | Kb 8-mer  | 8    | 25 |
| 18626  | <i>Per1</i>     | YTLRNQDTF   | Db 9-mer  | 55   | 25 |
| 56612  | <i>Pfdn5</i>    | SMYVPGKL    | Kb 8-mer  | 293  | 18 |
| 73739  | <i>Pgea1</i>    | ASLSNLHSL   | Db 9-mer  | 218  | 30 |
| 233489 | <i>Picalm</i>   | VAFDFTKV    | Kb 8-mer  | 45   | 20 |
| 83490  | <i>Pik3ap1</i>  | YGLKNLTAL   | Db 9-mer  | 40   | 29 |
| 18950  | <i>Pnp</i>      | SLITNKVVM   | Db 9-mer  | 104  | 26 |
| 231329 | <i>Polr2b</i>   | IGPTYQRL    | Kb 9-mer  | 23   | 20 |
| 18985  | <i>Pou2af1</i>  | SGPQFVQL    | Kb 8-mer  | 172  | 24 |
| 66385  | <i>Ppp1r7</i>   | RAIENIDTL   | Db 9-mer  | 7    | 30 |
| 51792  | <i>Ppp2r1a</i>  | IIPMFSNL    | Kb 8-mer  | 4    | 25 |
| 73699  | <i>Ppp2r1b</i>  | VADKFSSEL   | Kb 8-mer  | 375  | 23 |
| 106042 | <i>Prickle1</i> | LNYKFPGL    | Kb 8-mer  | 5    | 29 |
| 214572 | <i>Prrt7</i>    | VIVEFRDL    | Kb 8-mer  | 28   | 23 |
| 19167  | <i>Psm3</i>     | KAVENSSTAI  | Db 10-mer | 517  | 30 |
| 16913  | <i>Psm8</i>     | GGVNMVYHM   | Db 9-mer  | 135  | 27 |
| 15170  | <i>Ptpn6</i>    | AQYKFIYV    | Kb 8-mer  | 23   | 25 |
| 108911 | <i>Rcc2</i>     | AAYRNLGQNL  | Db 10-mer | 924  | 29 |
| 19696  | <i>Rel</i>      | TTLIFQKL    | Kb 8-mer  | 58   | 21 |
| 26374  | <i>Rfwd2</i>    | YVVDNIDHL   | Db 9-mer  | 156  | 25 |
| 74734  | <i>Rhoh</i>     | YSVANHNSFL  | Db 10-mer | 767  | 26 |
| 20054  | <i>Rps15</i>    | VGYYNGKTF   | Db 9-mer  | 3132 | 25 |
| 267019 | <i>Rps15a</i>   | VIVRFLTV    | Kb 8-mer  | 33   | 19 |
| 267019 | <i>Rps15a</i>   | ISPRFDVQL   | Kb 9-mer  | 172  | 14 |
| 20115  | <i>Rps7</i>     | VNFEFPEF    | Kb 8-mer  | 24   | 12 |
| 20133  | <i>Rrm1</i>     | FQIVNPHLL   | Db 9-mer  | 71   | 28 |
| 20133  | <i>Rrm1</i>     | YGIRNSLLI   | Db 9-mer  | 452  | 26 |
| 235623 | <i>Scap</i>     | SGYDFSRL    | Kb 8-mer  | 5    | 30 |
| 13722  | <i>Scye1</i>    | SGLVNHVPL   | Db 9-mer  | 59   | 29 |
| 20338  | <i>Sel1l</i>    | QALKYFNL    | Kb 8-mer  | 171  | 23 |
| 20393  | <i>Sgk</i>      | STLYSRM     | Kb 8-mer  | 38   | 18 |
| 432572 | <i>Specc1</i>   | TSLAFESRL   | Kb 9-mer  | 97   | 12 |
| 20740  | <i>Spna2</i>    | KALINADEL   | Db 9-mer  | 19   | 31 |
| 20815  | <i>Srp1</i>     | ISGVNGTHI   | Db 9-mer  | 55   | 28 |
| 20443  | <i>St3gal4</i>  | GAVKNLTYF   | Db 9-mer  | 81   | 30 |
| 20848  | <i>Stat3</i>    | ATLVFHNL    | Kb 8-mer  | 23   | 22 |
| 71728  | <i>Stk11ip</i>  | SALRFLNL    | Kb 8-mer  | 23   | 24 |
| 16430  | <i>Stt3a</i>    | AVLSFSTRL   | Kb 9-mer  | 154  | 13 |
| 108143 | <i>Taf9</i>     | SGLKYVNV    | Kb 8-mer  | 45   | 20 |
| 245638 | <i>Tbc1d8b</i>  | TAFRFSEL    | Kb 8-mer  | 23   | 23 |
| 216198 | <i>Tcp11l2</i>  | KATTNIVEM   | Db 9-mer  | 225  | 27 |
| 217353 | <i>Tmc6</i>     | ASYLFRGL    | Kb 8-mer  | 3    | 29 |
| 72759  | <i>Tmem135</i>  | KGFTFSAL    | Kb 8-mer  | 23   | 22 |
| 66074  | <i>Tmem167</i>  | AIFNFQSL    | Kb 8-mer  | 8    | 22 |
| 67878  | <i>Tmem33</i>   | QSIAFISRL   | Kb 9-mer  | 75   | 13 |

|        |               |            |           |     |    |
|--------|---------------|------------|-----------|-----|----|
| 21916  | <i>Tmod1</i>  | SSIVNKEGL  | Db 9-mer  | 228 | 30 |
| 22057  | <i>Tob1</i>   | ISYLYNKL   | Kb 8-mer  | 4   | 29 |
| 21973  | <i>Top2a</i>  | NSMVLFDHV  | Db 9-mer  | 228 | 14 |
| 21990  | <i>Tph1</i>   | FSLENEVGGL | Db 10-mer | 728 | 28 |
| 21990  | <i>Tph1</i>   | WGTIFREL   | Kb 8-mer  | 309 | 22 |
| 12751  | <i>Tpp1</i>   | IQRVNTEFM  | Db 9-mer  | 100 | 25 |
| 100683 | <i>Trrap</i>  | QDPVFQKL   | Kb 8-mer  | 885 | 22 |
| 73710  | <i>Tubb2b</i> | VNMVPPRL   | Kb 9-mer  | 252 | 20 |
| 56085  | <i>Ubqln1</i> | RALSNLESI  | Db 9-mer  | 87  | 30 |
| 224826 | <i>Ubr2</i>   | VAYKFPELL  | Kb 9-mer  | 6   | 28 |
| 59025  | <i>Usp14</i>  | VKYLFTGL   | Kb 8-mer  | 20  | 27 |
| 216825 | <i>Usp22</i>  | FAVVNHQGTI | Db 10-mer | 985 | 31 |
| 271564 | <i>Vps13a</i> | VSIQFYHL   | Kb 8-mer  | 3   | 22 |
| 230895 | <i>Vps13d</i> | INIHYTQL   | Kb 8-mer  | 39  | 25 |
| 80743  | <i>Vps16</i>  | VSFTYRYL   | Kb 8-mer  | 3   | 22 |
| 77573  | <i>Vps33a</i> | GSLANHTSI  | Db 9-mer  | 161 | 27 |
| 233405 | <i>Vps33b</i> | ASLVNADKL  | Db 9-mer  | 25  | 31 |
| 65114  | <i>Vps35</i>  | FSEENHEPL  | Db 9-mer  | 33  | 27 |
| 218035 | <i>Vps41</i>  | IGLAYVNHL  | Kb 9-mer  | 17  | 13 |
| 22375  | <i>Wars</i>   | YTVENAKDII | Db 10-mer | 492 | 26 |
| 69544  | <i>Wdr5b</i>  | AALENDKTI  | Db 9-mer  | 56  | 31 |
| 74781  | <i>Wipi2</i>  | SGYKFFSL   | Kb 8-mer  | 14  | 29 |
| 22446  | <i>Xlr3b</i>  | VAAANREVL  | Db 9-mer  | 111 | 26 |
| 68090  | <i>Yif1a</i>  | SGYKYVGM   | Kb 8-mer  | 17  | 25 |
| 66980  | <i>Zdhc6</i>  | SVIKFENL   | Kb 8-mer  | 44  | 25 |

MHC Ib-associated peptides

| GeneID | Gene symbol          | Peptides  | Restriction size | Rankpep |
|--------|----------------------|-----------|------------------|---------|
| 224171 | <i>C330027C09Rik</i> | AQNDIEHLF | Qa2 9-mer        | 155     |
| 75565  | <i>Ccdc101</i>       | ELLTELHQL | Qa2 9-mer        | 198     |
| 13204  | <i>Dhx15</i>         | TLLNVYHAF | Qa2 9-mer        | 215     |
| 66366  | <i>Ergic3</i>        | QQLDVEHNL | Qa2 9-mer        | 212     |
| 108655 | <i>Foxp1</i>         | QQLQQQHLL | Qa2 9-mer        | 148     |
| 15016  | <i>H2-Q5</i>         | AMAPRTLLL | Qa1 9-mer        |         |
| 212307 | <i>Mapre2</i>        | QLNEQVHSL | Qa2 9-mer        | 176     |
| 68979  | <i>Nol11</i>         | TQLIQTHVL | Qa2 9-mer        | 150     |
| 69608  | <i>Sec24d</i>        | ESQSVIHNL | Qa2 9-mer        | 185     |
| 319565 | <i>Syne2</i>         | DLIQTIHEL | Qa2 9-mer        | 213     |
| 50875  | <i>Tmod3</i>         | AAILGMHNL | Qa2 9-mer        | 134     |

Table S5. List of genes coding for MHC I peptides differentially expressed in neoplastic (EL4) versus normal thymocytes and involved in carcinogenesis

| Functional classification | Gene symbol             | Gene ID               | Sequence    | P values | EL4/Thy |
|---------------------------|-------------------------|-----------------------|-------------|----------|---------|
| Transcription             | <i>Pa2g4</i> (1–4)      | 18813                 | AQFKFTVL    | 0.018    | 4.6     |
|                           | <i>Top2a</i> (5)        | 21973                 | NSMVLFDHV   | 0.020    | 15.6    |
|                           | <i>Dnmt1</i> (6, 7)     | 13433                 | LSLENGHTL   | 0.022    | 8.9     |
|                           | <i>Pfdn5</i> (8, 9)     | 56612                 | SMYVPGKL    | 0.036    | 16.6    |
|                           | <i>Per1</i> (10, 11)    | 18626                 | YTLRNQDTF   | 0.036    | 5.0     |
|                           | <i>Foxp1</i> (12, 13)   | 108655                | QQLQQQHLL   | 0.010    | −4.3    |
|                           | <i>Bach2</i> (14, 15)   | 12014                 | EQLEFIHDI   | 0.015    | −20.2   |
|                           | <i>Ddx5</i> (16, 17)    | 13207                 | NQAINPKLLQL | 0.021    | −5.7    |
|                           | Cell differentiation    | <i>Ptpn6</i> (18, 19) | 15170       | AQYKFIYV | 0.028   |
| <i>RhoH</i> (20, 21)      |                         | 74734                 | YSVANHNSFL  | 0.019    | −3.1    |
| <i>Pi3kap1</i> (22, 23)   |                         | 83490                 | YSVANHNSFL  | 0.001    | −21.8   |
| Cell cycle                | <i>Cdkn1b</i> (24–26)   | 12576                 | FGPVNHEEL   | 0.003    | −3.1    |
| Apoptosis                 | <i>Sgk</i> (27–29)      | 20393                 | STLTYSRM    | 0.022    | 9.7     |
|                           | <i>Pdcd10</i> (30)      | 56426                 | ILQTFKTV    | 0.001    | −4.3    |
| Signal transduction       | <i>Cxcr4</i> (31, 32)   | 12767                 | VVWFQFQHI   | 0.003    | 2.6     |
|                           | <i>CD97</i> (33, 34)    | 26364                 | KLLSNINSVF  | 0.033    | −4.6    |
| Translation               | <i>Eif3s10</i> (35, 36) | 13669                 | QSIEFSRL    | 0.015    | 3.2     |
|                           | <i>Eif3s2</i> (35, 36)  | 54709                 | FGPINSVAF   | 0.035    | 5.3     |
| Miscellaneous             | <i>Dhx15</i> (37)       | 13204                 | TLLNVYHAF   | 0.017    | −11.5   |
|                           | <i>Gtpbp4</i> (38)      | 69237                 | QILSDFPKL   | 0.034    | 2.6     |
|                           | <i>Igtp</i> (39)        | 16145                 | IVAENTKTSL  | 0.001    | −15.5   |

## References

- Squatrito, M., M. Mancino, M. Donzelli, L.B. Areces, and G.F. Draetta. 2004. EBP1 is a nucleolar growth-regulating protein that is part of pre-ribosomal ribonucleoprotein complexes. *Oncogene*. 23:4454–4465.
- Zhang, Y., X.W. Wang, D. Jelovac, T. Nakanishi, M.H. Yu, D. Akinmade, O. Goloubeva, D.D. Ross, A. Brodie, and A.W. Hamburger. 2005. The ErbB3-binding protein Ebp1 suppresses androgen receptor-mediated gene transcription and tumorigenesis of prostate cancer cells. *Proc. Natl. Acad. Sci. USA*. 102:9890–9895.
- Ahn, J.Y., X. Liu, Z. Liu, L. Pereira, D. Cheng, J. Peng, P.A. Wade, A.W. Hamburger, and K. Ye. 2006. Nuclear Akt associates with PKC-phosphorylated Ebp1, preventing DNA fragmentation by inhibition of caspase-activated DNase. *EMBO J*. 25:2083–2095.
- Liu, Z., J.Y. Ahn, X. Liu, and K. Ye. 2006. Ebp1 isoforms distinctively regulate cell survival and differentiation. *Proc. Natl. Acad. Sci. USA*. 103:10917–10922.
- Murphy, A.J., C.A. Hughes, C. Barrett, H. Magee, B. Loftus, J.J. O'Leary, and O. Sheils. 2007. Low-level TOP2A amplification in prostate cancer is associated with HER2 duplication, androgen resistance, and decreased survival. *Cancer Res*. 67:2893–2898.
- Brown, K.D., and K.D. Robertson. 2007. DNMT1 knockout delivers a strong blow to genome stability and cell viability. *Nat. Genet*. 39:289–290.
- Rhee, I., K.E. Bachman, B.H. Park, K.W. Jair, R.W. Yen, K.E. Schuebel, H. Cui, A.P. Feinberg, C. Lengauer, K.W. Kinzler, et al. 2002. DNMT1 and DNMT3b cooperate to silence genes in human cancer cells. *Nature*. 416:552–556.
- Fujioka, Y., T. Taira, Y. Maeda, S. Tanaka, H. Nishihara, S.M. Iguchi-Ariga, K. Nagashima, and H. Ariga. 2001. MM-1, a c-Myc-binding protein, is a candidate for a tumor suppressor in leukemia/lymphoma and tongue cancer. *J. Biol. Chem*. 276:45137–45144.
- Hoffman, B., A. Amanullah, M. Shafarenko, and D.A. Liebermann. 2002. The proto-oncogene c-myc in hematopoietic development and leukemogenesis. *Oncogene*. 21:3414–3421.
- Chen, S.T., K.B. Choo, M.F. Hou, K.T. Yeh, S.J. Kuo, and J.G. Chang. 2005. Deregulated expression of the PER1, PER2 and PER3 genes in breast cancers. *Carcinogenesis*. 26:1241–1246.
- Gery, S., N. Komatsu, N. Kawamata, C.W. Miller, J. Desmond, R.K. Virk, A. Marchevsky, R. McKenna, H. Taguchi, and H.P. Koeffler. 2007. Epigenetic silencing of the candidate tumor suppressor gene Per1 in non-small cell lung cancer. *Clin. Cancer Res*. 13:1399–1404.
- Banham, A.H., N. Beasley, E. Campo, P.L. Fernandez, C. Fidler, K. Gatter, M. Jones, D.Y. Mason, J.E. Prime, P. Trougouboff, et al. 2001. The FOXP1 winged helix transcription factor is a novel candidate tumor suppressor gene on chromosome 3p. *Cancer Res*. 61:8820–8829.
- Wlodarska, I., E. Veyt, P. De Paep, P. Vandenberghe, P. Nooijen, I. Theate, L. Michaux, X. Sagaert, P. Marynen, A. Hagemeijer, and C. De Wolf-Peeters. 2005. FOXP1, a gene highly expressed in a subset of diffuse large B-cell lymphoma, is recurrently targeted by genomic aberrations. *Leukemia*. 19:1299–1305.
- Gutierrez, N.C., E.M. Ocio, J. de Las Rivas, P. Maiso, M. Delgado, E. Ferminan, M.J. Arcos, M.L. Sanchez, J.M. Hernandez, and J.F. San Miguel. 2007. Gene expression profiling of B lymphocytes and plasma cells from Waldenstrom's macroglobulinemia: comparison with expression patterns of the same cell counterparts from chronic lymphocytic leukemia, multiple myeloma and normal individuals. *Leukemia*. 21:541–549.
- Yoshida, C., F. Yoshida, D.E. Sears, S.M. Hart, D. Ikebe, A. Muto, S. Basu, K. Igarashi, and J.V. Melo. 2007. Bcr-Abl signaling through the PI-3/S6 kinase pathway inhibits nuclear translocation of the transcription factor Bach2, which represses the antiapoptotic factor heme oxygenase-1. *Blood*. 109:1211–1219.
- Causevic, M., R.G. Hislop, N.M. Kernohan, F.A. Carey, R.A. Kay, R.J. Steele, and F.V. Fuller-Pace. 2001. Overexpression and poly-ubiquitylation of the DEAD-box RNA helicase p68 in colorectal tumours. *Oncogene*. 20:7734–7743.
- Yang, L., C. Lin, and Z.R. Liu. 2005. Phosphorylations of DEAD box p68 RNA helicase are associated with cancer development and cell proliferation. *Mol. Cancer Res*. 3:355–363.
- Cuevas, B., Y. Lu, S. Watt, R. Kumar, J. Zhang, K.A. Siminovitch, and G.B. Mills. 1999. SHP-1 regulates Lck-induced phosphatidylinositol 3-kinase phosphorylation and activity. *J. Biol. Chem*. 274:27583–27589.
- Zhang, Q., H.Y. Wang, M. Marzec, P.N. Raghunath, T. Nagasawa, and M.A. Wasik. 2005. STAT3- and DNA methyltransferase 1-mediated epigenetic silencing of SHP-1 tyrosine phosphatase tumor suppressor gene in malignant T lymphocytes. *Proc. Natl. Acad. Sci. USA*. 102:6948–6953.
- Duquette, M.L., M.D. Huber, and N. Maizels. 2007. G-rich proto-oncogenes are targeted for genomic instability in B-cell lymphomas. *Cancer Res*. 67:2586–2594.
- Pasqualucci, L., P. Neumeister, T. Goossens, G. Nanjangud, R.S. Chaganti, R. Kuppers, and R. Dalla-Favera. 2001. Hypermutation of multiple proto-oncogenes in B-cell diffuse large-cell lymphomas. *Nature*. 412:341–346.
- Okada, T., A. Maeda, A. Iwamoto, K. Gotoh, and T. Kurosaki. 2000. BCAP: the tyrosine kinase substrate that connects B cell receptor to phosphoinositide 3-kinase activation. *Immunity*. 13:817–827.
- Yamazaki, T., K. Takeda, K. Gotoh, H. Takeshima, S. Akira, and T. Kurosaki. 2002. Essential immunoregulatory role for BCAP in B cell development and function. *J. Exp. Med*. 195:535–545.
- Chien, W.M., S. Rabin, E. Macias, P.L. Miliani de Marval, K. Garrison, J. Orthel, M. Rodriguez-Puebla, and M.L. Fero. 2006. Genetic mosaics reveal both cell-autonomous and cell-nonautonomous function of murine p27Kip1. *Proc. Natl. Acad. Sci. USA*. 103:4122–4127.
- Fu, Y., Z. Fang, Y. Liang, X. Zhu, P. Prins, Z. Li, L. Wang, L. Sun, J. Jin, Y. Yang, and X. Zha. 2007. Overexpression of integrin beta1 inhibits proliferation of hepatocellular carcinoma cell SMMC-7721 through preventing Skp2-dependent degradation of p27 via PI3K pathway. *J. Cell. Biochem*. 102:704–718.
- Nakayama, K.I., and K. Nakayama. 2006. Ubiquitin ligases: cell-cycle control and cancer. *Nat. Rev. Cancer*. 6:369–381.

27. Buse, P., S.H. Tran, E. Luther, P.T. Phu, G.W. Aponte, and G.L. Firestone. 1999. Cell cycle and hormonal control of nuclear-cytoplasmic localization of the serum- and glucocorticoid-inducible protein kinase, Sgk, in mammary tumor cells. A novel convergence point of anti-proliferative and proliferative cell signaling pathways. *J. Biol. Chem.* 274:7253–7263.
28. Sakoda, H., Y. Gotoh, H. Katagiri, M. Kurokawa, H. Ono, Y. Onishi, M. Anai, T. Ogihara, M. Fujishiro, Y. Fukushima, et al. 2003. Differing roles of Akt and serum- and glucocorticoid-regulated kinase in glucose metabolism, DNA synthesis, and oncogenic activity. *J. Biol. Chem.* 278:25802–25807.
29. Tessier, M., and J.R. Woodgett. 2006. Serum and glucocorticoid-regulated protein kinases: variations on a theme. *J. Cell. Biochem.* 98:1391–1407.
30. Chen, P.Y., W.S. Chang, R.H. Chou, Y.K. Lai, S.C. Lin, C.Y. Chi, and C.W. Wu. 2007. Two non-homologous brain diseases-related genes, SERPINI1 and PDCD10, are tightly linked by an asymmetric bidirectional promoter in an evolutionarily conserved manner. *BMC Mol. Biol.* 8:2.
31. Spoo, A.C., M. Lubbert, W.G. Wierda, and J.A. Burger. 2007. CXCR4 is a prognostic marker in acute myelogenous leukemia. *Blood.* 109:786–791.
32. Tavor, S., I. Petit, S. Porozov, A. Avigdor, A. Dar, L. Leider-Trejo, N. Shemtov, V. Deutsch, E. Naparstek, A. Nagler, and T. Lapidot. 2004. CXCR4 regulates migration and development of human acute myelogenous leukemia stem cells in transplanted NOD/SCID mice. *Cancer Res.* 64:2817–2824.
33. Aust, G., W. Eichler, S. Laue, I. Lehmann, N.E. Heldin, O. Lotz, W.A. Scherbaum, H. Dralle, and C. Hoang-Vu. 1997. CD97: a dedifferentiation marker in human thyroid carcinomas. *Cancer Res.* 57:1798–1806.
34. Wobus, M., O. Huber, J. Hamann, and G. Aust. 2006. CD97 overexpression in tumor cells at the invasion front in colorectal cancer (CC) is independently regulated of the canonical Wnt pathway. *Mol. Carcinog.* 45:881–886.
35. Dong, Z., and J.T. Zhang. 2006. Initiation factor eIF3 and regulation of mRNA translation, cell growth, and cancer. *Crit. Rev. Oncol. Hematol.* 59:169–180.
36. Zhang, L., X. Pan, and J.W. Hershey. 2007. Individual overexpression of five subunits of human translation initiation factor eIF3 promotes malignant transformation of immortal fibroblast cells. *J. Biol. Chem.* 282:5790–5800.
37. Nakagawa, Y., A. Yoshida, K. Numoto, T. Kunisada, D. Wai, N. Ohata, K. Takeda, A. Kawai, and T. Ozaki. 2006. Chromosomal imbalances in malignant peripheral nerve sheath tumor detected by metaphase and microarray comparative genomic hybridization. *Oncol. Rep.* 15:297–303.
38. Lee, H., D. Kim, H.C. Dan, E.L. Wu, T.M. Gritsko, C. Cao, S.V. Nicosia, E.A. Golemis, W. Liu, D. Coppola, et al. 2007. Identification and characterization of putative tumor suppressor NGB, a GTP-binding protein that interacts with the neurofibromatosis 2 protein. *Mol. Cell. Biol.* 27:2103–2119.
39. Zhang, H.M., J. Yuan, P. Cheung, H. Luo, B. Yanagawa, D. Chau, N. Stephan-Tozy, B.W. Wong, J. Zhang, J.E. Wilson, et al. 2003. Overexpression of interferon-gamma-inducible GTPase inhibits coxsackievirus B3-induced apoptosis through the activation of the phosphatidylinositol 3-kinase/Akt pathway and inhibition of viral replication. *J. Biol. Chem.* 278:33011–33019.

**Table S6.** Relative abundance of MHC I-associated peptides eluted from primary thymocytes versus in vivo grown EL4

| GeneID | Gene symbol          | Peptide     | Average intensities from |            |          | EL4/Thy |
|--------|----------------------|-------------|--------------------------|------------|----------|---------|
|        |                      |             | EL4                      | Thymocytes | P values |         |
| 68295  | <i>O610011L14Rik</i> | ISILYHQL    | 810647                   | 1248361    | 0.10     | -1.5    |
| 68523  | <i>1110019N10Rik</i> | AALENTHLL   | 116372                   | 145359     | 0.63     | -1.2    |
| 72368  | <i>2310045N01Rik</i> | SSVYFRSV    | 94609                    | 42165      | 0.09     | 2.2     |
| 75425  | <i>2610036D13Rik</i> | QTVENVEHL   | 268223                   | 422026     | 0.20     | -1.6    |
| 72722  | <i>2810405J04Rik</i> | ASPEFTKL    | 1928424                  | 879573     | 0.07     | 2.2     |
| 72747  | <i>2810439F02Rik</i> | SGYDFENRL   | 55031                    | 123324     | 0.13     | -2.2    |
| 67268  | <i>2900073G15Rik</i> | SMGKNPTDEYL | 2911106                  | 762807     | 0.05     | 3.8     |
| 218989 | <i>6720456H20Rik</i> | TGIRNLEWL   | 197157                   | 149305     | 0.56     | 1.3     |
| 319236 | <i>9230105E10Rik</i> | FISDVEHQL   | 12000                    | 278323     | 0.01     | -23.2   |
| 11307  | <i>Abcg1</i>         | VNIEFKDL    | 2074080                  | 1805346    | 0.54     | 1.1     |
| 66713  | <i>Actr2</i>         | YAGSNFPEHI  | 2319817                  | 1277449    | 0.04     | 1.8     |
| 67019  | <i>Actr6</i>         | SGYSFTHI    | 436804                   | 141915     | 0.06     | 3.1     |
| 57869  | <i>Adck2</i>         | SGPTYIKL    | 86469                    | 161672     | 0.26     | -1.9    |
| 81702  | <i>Ankrd17</i>       | ASVLNVNHI   | 5882733                  | 5485733    | 0.65     | 1.1     |
| 329154 | <i>Ankrd44</i>       | ASVINGHTL   | 385034                   | 353775     | 0.79     | 1.1     |
| 54208  | <i>Arl6ip1</i>       | IILKYIGM    | 246911                   | 127103     | 0.16     | 1.9     |
| 192195 | <i>Ash1l</i>         | VGLINKDSV   | 241257                   | 132489     | 0.28     | 1.8     |
| Q9JKK8 | <i>Atr</i>           | FQALNAEKL   | 60707                    | 89418      | 0.20     | -1.5    |
| 54138  | <i>Atnx10</i>        | NSIRNLDTI   | 11787170                 | 22819844   | 0.03     | -1.9    |
| 328099 | <i>AU021838</i>      | VSYLFSHV    | 432991                   | 356073     | 0.63     | 1.2     |
| 235461 | <i>B230380D07Rik</i> | VNVRFQGV    | 54488                    | 74969      | 0.31     | -1.4    |
| 12014  | <i>Bach2</i>         | EQLEFIHDI   | 12000                    | 242371     | 0.01     | -20.2   |
| 224727 | <i>Bat3</i>          | SIAAFIQRL   | 133395                   | 93668      | 0.45     | 1.4     |
| 66165  | <i>Bccip</i>         | KAPVNTAEL   | 210648                   | 387950     | 0.17     | -1.8    |
| 107976 | <i>Bre</i>           | ATQVYPKL    | 626010                   | 343031     | 0.21     | 1.8     |
| 224171 | <i>C330027C09Rik</i> | AQNDIEHLF   | 296259                   | 355661     | 0.61     | -1.2    |
| 26885  | <i>Casp8ap2</i>      | VTVLNVDDL   | 112568                   | 295624     | 0.06     | -2.6    |
| 75565  | <i>Ccdc101</i>       | ELLTELHQL   | 109977                   | 377688     | 0.06     | -3.4    |
| 76041  | <i>Ccdc125</i>       | NAVLNQRYL   | 53422                    | 80693      | 0.05     | -1.5    |
| 77048  | <i>Ccdc41</i>        | AQVENVQRI   | 77635                    | 214892     | 0.005    | -2.8    |
| 12445  | <i>Ccnd3</i>         | AAVIAHDFL   | 195002                   | 116726     | 0.31     | 1.7     |
| 12449  | <i>Ccnf</i>          | SQAVNKQVI   | 46629                    | 75687      | 0.48     | -1.6    |
| 12501  | <i>Cd3e</i>          | YSGLNQRAV   | 92673                    | 193576     | 0.05     | -2.1    |
| 26364  | <i>Cd97</i>          | KLLSNINSVF  | 177758                   | 812560     | 0.03     | -4.6    |
| 12576  | <i>Cdkn1b</i>        | FGPVNHHEEL  | 2765989                  | 8474581    | 0.003    | -3.1    |
| 216859 | <i>Centb1</i>        | INQIYEARV   | 242126                   | 288600     | 0.58     | -1.2    |
| 12649  | <i>Chek1</i>         | TGPSNVDKL   | 5073167                  | 2489307    | 0.02     | 2.0     |
| 243764 | <i>Chrm2</i>         | TVIGYWPL    | 57092                    | 112673     | 0.17     | -2.0    |
| 70349  | <i>Copb1</i>         | IALRYVAL    | 579237                   | 197990     | 0.01     | 2.9     |
| 67876  | <i>Coq10b</i>        | ISFEFRSL    | 46870                    | 41415      | 0.74     | 1.1     |
| 71745  | <i>Cul2</i>          | VINSFVHV    | 163398                   | 55024      | 0.06     | 3.0     |
| 12767  | <i>Cxcr4</i>         | VVFQFOHI    | 165482                   | 63047      | 0.003    | 2.6     |
| 52635  | <i>D12Ertd551e</i>   | RQLENGTTL   | 405701                   | 580254     | 0.28     | -1.4    |
| 218978 | <i>D14Ertd436e</i>   | SQHVNLQDL   | 274085                   | 752598     | 0.04     | -2.7    |
| 69601  | <i>Dab2ip</i>        | VSPTNPTKL   | 148633                   | 180896     | 0.52     | -1.2    |
| 67755  | <i>Ddx47</i>         | KTFLFSATM   | 76238                    | 60088      | 0.50     | 1.3     |
| 13207  | <i>Ddx5</i>          | NQAINPKLLQL | 20171                    | 115009     | 0.02     | -5.7    |
| 13209  | <i>Ddx6</i>          | INFDFPKL    | 867416                   | 2016311    | 0.02     | -2.3    |
| 13204  | <i>Dhx15</i>         | TLLNVYHAF   | 72069                    | 827769     | 0.01     | -11.5   |
| 13433  | <i>Dnmt1</i>         | LSENGHTHL   | 1108884                  | 124482     | 0.02     | 8.9     |
| 94176  | <i>Dock2</i>         | SMVQNRVFL   | 182029                   | 261777     | 0.56     | -1.4    |
| 233115 | <i>Dpy19l3</i>       | SWAFHNL     | 114097                   | 81273      | 0.53     | 1.4     |
| 13424  | <i>Dync1h1</i>       | ASYEFVQRL   | 2301414                  | 1013239    | 0.08     | 2.3     |
| 13669  | <i>Eif3s10</i>       | QSIEFSRL    | 3422637                  | 1081266    | 0.02     | 3.2     |
| 73830  | <i>Eif3s12</i>       | VGITYQHI    | 1223275                  | 1317577    | 0.88     | -1.1    |
| 54709  | <i>Eif3s2</i>        | FGPINSVAF   | 63523                    | 12000      | 0.03     | 5.3     |
| 10436  | <i>Emg1</i>          | VSVEYTEKM   | 82838                    | 67514      | 0.30     | 1.2     |
| 13819  | <i>Epas1</i>         | SNYLFTEL    | 704947                   | 1387353    | 0.05     | -2.0    |
| 66366  | <i>Ergic3</i>        | QLLDVEHNL   | 193740                   | 378788     | 0.07     | -2.0    |
| 212377 | <i>F730047E07Rik</i> | VGVTYRTL    | 152126                   | 70387      | 0.12     | 2.2     |
| 107035 | <i>Fbxo38</i>        | SAFSFRTL    | 270808                   | 192573     | 0.34     | 1.4     |
| 14137  | <i>Fdft1</i>         | ISLEFRNL    | 198436                   | 214993     | 0.81     | -1.1    |
| 57778  | <i>Fmn1</i>          | LQYEFTHL    | 1190978                  | 933913     | 0.45     | 1.3     |
| 22379  | <i>Fmn3</i>          | LQYEFTEL    | 1171553                  | 1937711    | 0.05     | -1.7    |
| 108655 | <i>Foxp1</i>         | QQLQQQHLL   | 518392                   | 2217859    | 0.01     | -4.3    |
| 14359  | <i>Fxr1h</i>         | EIVTFERL    | 336814                   | 132963     | 0.08     | 2.5     |
| 14790  | <i>Grcc10</i>        | SAPENAVRM   | 3734208                  | 2535151    | 0.66     | 1.5     |
| 68153  | <i>Gtf2e2</i>        | SGYKFGVL    | 972201                   | 381917     | 0.06     | 2.5     |
| 69237  | <i>Gtpbp4</i>        | QILSDFPKL   | 1361649                  | 526685     | 0.03     | 2.6     |
| 15016  | <i>H2-Q5</i>         | AMAPRLLLL   | 2156626                  | 5661232    | 0.06     | -2.6    |
| 15019  | <i>H2-Q8</i>         | FAYEGRDYI   | 2248785                  | 1616977    | 0.29     | 1.4     |
| 15201  | <i>Hells</i>         | KVLVFSQM    | 263746                   | 52922      | 0.06     | 5.0     |
| 15257  | <i>Hipk1</i>         | SLLTNHVTL   | 504676                   | 412123     | 0.63     | 1.2     |
| 319189 | <i>Hist2h2bb</i>     | SVVYKVL     | 5932574                  | 2470423    | 0.02     | 2.4     |
| 98758  | <i>Hnrpf</i>         | FSPLNPVRV   | 101312                   | 82387      | 0.49     | 1.2     |
| 16145  | <i>Igtp</i>          | IVAENTKLSL  | 12000                    | 185606     | 0.001    | -15.5   |
| 23918  | <i>Impdh2</i>        | GGIQNVGHI   | 29380844                 | 17244971   | 0.01     | 1.7     |
| 16329  | <i>Inpp1</i>         | YMGTDNIHSL  | 37800                    | 259193     | 0.09     | -6.9    |

|        |                |             |          |          |       |        |
|--------|----------------|-------------|----------|----------|-------|--------|
| 76582  | <i>Ipo11</i>   | TIILFTKV    | 99616    | 76723    | 0.41  | 1.3    |
| 338523 | <i>Jhdm1d</i>  | SSIQNGKYTL  | 182192   | 886026   | 0.02  | -4.9   |
| 110308 | <i>Krt5</i>    | AAYMNKVEL   | 12000    | 1280013  | 0.04  | -106.7 |
| 110310 | <i>Krt7</i>    | AAYTNKVEL   | 12000    | 1458071  | 0.00  | -121.5 |
| 72416  | <i>Lrp4</i>    | AAIENIEHL   | 159927   | 163843   | 0.95  | -1.0   |
| 26413  | <i>Mapk1</i>   | VGPRYTNL    | 15419971 | 25982309 | 0.02  | -1.7   |
| 212307 | <i>Mapre2</i>  | QLNEQVHSL   | 130503   | 225894   | 0.28  | -1.7   |
| 17168  | <i>Mare</i>    | SAVKNLQQL   | 2084131  | 2315130  | 0.64  | -1.1   |
| 13728  | <i>Mark2</i>   | ASIQNGKDSL  | 358351   | 132344   | 0.03  | 2.7    |
| 217615 | <i>Mgea6</i>   | RNQVYTQL    | 179246   | 186263   | 0.89  | -1.0   |
| 67014  | <i>Mina</i>    | VVYIYHSL    | 86825    | 230698   | 0.10  | -2.7   |
| 17427  | <i>Mns1</i>    | KIIEFANI    | 12000    | 149382   | 0.01  | -12.4  |
| 219135 | <i>Mtmr6</i>   | VGIENIHVM   | 46307    | 499479   | 0.06  | -10.8  |
| 17886  | <i>Myh9</i>    | RVAEFTNL    | 469290   | 706492   | 0.28  | -1.5   |
| 67938  | <i>Mylc2b</i>  | SLGKNPTDAYL | 4571127  | 1100520  | 0.01  | 4.2    |
| 67608  | <i>Narf</i>    | AAYGFRNI    | 141414   | 67434    | 0.11  | 2.1    |
| 67563  | <i>Narfl</i>   | VAYGFRNI    | 104022   | 12000    | 0.01  | 8.7    |
| 17992  | <i>Ndufa4</i>  | VNVDYSKL    | 6565000  | 10705177 | 0.06  | -1.6   |
| 227197 | <i>Ndufs1</i>  | AKLVNQEVL   | 502906   | 132505   | 0.07  | 3.8    |
| 18034  | <i>Nfkb2</i>   | AALQNLEQL   | 275269   | 482669   | 0.53  | -1.8   |
| 64652  | <i>Nisch</i>   | TNQDFIQL    | 395004   | 137997   | 0.12  | 2.9    |
| 97895  | <i>Nlrp4f</i>  | TPVKNIIDTV  | 44098    | 40329    | 0.72  | 1.1    |
| 68979  | <i>Nol11</i>   | TQLIQTHVL   | 344889   | 793732   | 0.04  | -2.3   |
| 211548 | <i>Nomo1</i>   | SSLVNKEDV   | 45468    | 76970    | 0.07  | -1.7   |
| 66394  | <i>Nosip</i>   | TSVRFTQL    | 3233929  | 3880050  | 0.30  | -1.2   |
| 18145  | <i>Npc1</i>    | VAVWNKVDI   | 337841   | 629999   | 0.13  | -1.9   |
| 101706 | <i>Numa1</i>   | VSILNRQVL   | 678568   | 917089   | 0.33  | -1.4   |
| 70699  | <i>Nup205</i>  | VNNEFEKL    | 109609   | 505624   | 0.01  | -4.6   |
| 18813  | <i>Pa2g4</i>   | AQKFTVL     | 55142    | 12000    | 0.02  | 4.6    |
| 66923  | <i>Pbrm1</i>   | SQVYNDAAHI  | 70006    | 242803   | 0.02  | -3.5   |
| 18538  | <i>Pcna</i>    | RAEDNADTLAL | 49024    | 73938    | 0.24  | -1.5   |
| 56426  | <i>Pdcd10</i>  | ILQTFKTVA   | 71543    | 309466   | 0.001 | -4.3   |
| 207728 | <i>Pde2a</i>   | IKNENQEV    | 308207   | 19230    | 0.02  | 16.0   |
| 23986  | <i>Peci</i>    | SSYTFPKM    | 274504   | 246774   | 0.82  | 1.1    |
| 18626  | <i>Per1</i>    | YTLRNQDTF   | 59957    | 12000    | 0.04  | 5.0    |
| 56612  | <i>Pfdn5</i>   | SMYVPGKL    | 199322   | 12000    | 0.04  | 16.6   |
| 73739  | <i>Pgea1</i>   | ASLSNLHSL   | 284222   | 107706   | 0.13  | 2.6    |
| 233489 | <i>Picalm</i>  | VAFDFTKV    | 1026391  | 970576   | 0.78  | 1.1    |
| 83490  | <i>Pik3ap1</i> | YGLKNLTAL   | 74055    | 1614342  | 0.001 | -21.8  |
| 231329 | <i>Polr2b</i>  | IGPTYQRL    | 152006   | 456565   | 0.06  | -3.0   |
| 66385  | <i>Ppp1r7</i>  | RAIENIDTL   | 1371985  | 2449039  | 0.06  | -1.8   |
| 73699  | <i>Ppp2r1b</i> | VADKFSEL    | 123409   | 43924    | 0.10  | 2.8    |
| 214572 | <i>Prmt7</i>   | VIVEFRDL    | 127033   | 144217   | 0.65  | -1.1   |
| 16913  | <i>Psmb8</i>   | GGVWNYHM    | 312549   | 367796   | 0.77  | -1.2   |
| 15170  | <i>Ptpn6</i>   | AQYKFIYV    | 2532589  | 774524   | 0.03  | 3.3    |
| 108911 | <i>Rcc2</i>    | AAAYRNLGQNL | 323760   | 12000    | 0.04  | 27.0   |
| 19696  | <i>Rel</i>     | TTLIFQKL    | 52627    | 69335    | 0.46  | -1.3   |
| 26374  | <i>Rfwd2</i>   | YVVDNIDHL   | 103204   | 182323   | 0.17  | -1.8   |
| 74734  | <i>Rhoh</i>    | YSVANHNSFL  | 257883   | 790683   | 0.02  | -3.1   |
| 68477  | <i>Rmnd5a</i>  | WAVSNREML   | 12000    | 74507    | 0.02  | -6.2   |
| 20054  | <i>Rps15</i>   | VGYYNGKTF   | 94776    | 119204   | 0.32  | -1.3   |
| 267019 | <i>Rps15a</i>  | VIVRFLTV    | 561265   | 225633   | 0.15  | 2.5    |
| 267019 | <i>Rps15a</i>  | ISPRFDVQL   | 487134   | 141860   | 0.08  | 3.4    |
| 20115  | <i>Rps7</i>    | VNFEFPEF    | 315064   | 460959   | 0.42  | -1.5   |
| 20133  | <i>Rrm1</i>    | YGIRNSLLI   | 2099554  | 1995074  | 0.76  | 1.1    |
| 20133  | <i>Rrm1</i>    | FQIVNPHLL   | 8238219  | 6013528  | 0.18  | 1.4    |
| 235623 | <i>Scap</i>    | SGYDFSRL    | 215152   | 296647   | 0.35  | -1.4   |
| 13722  | <i>Scye1</i>   | SGLVNHVPL   | 121736   | 137771   | 0.81  | -1.1   |
| 69608  | <i>Sec24d</i>  | ESQSVIHNL   | 154217   | 185515   | 0.71  | -1.2   |
| 20338  | <i>Sel1l</i>   | QALKYFNL    | 342436   | 120117   | 0.06  | 2.9    |
| 20393  | <i>Sgk</i>     | STLYSRM     | 301908   | 67793    | 0.02  | 9.7    |
| 432572 | <i>Specc1</i>  | TSLAFESRL   | 84991    | 12000    | 0.005 | 7.1    |
| 20740  | <i>Spna2</i>   | KALINADEL   | 4367025  | 7898847  | 0.05  | -1.8   |
| 20815  | <i>Srp1</i>    | ISGVNGTHI   | 1498558  | 1233136  | 0.46  | 1.2    |
| 20443  | <i>St3gal4</i> | GAVKNLTYF   | 84768    | 217591   | 0.12  | -2.6   |
| 20848  | <i>Stat3</i>   | ATLVFHNL    | 8702796  | 6298873  | 0.13  | 1.4    |
| 71728  | <i>Stk11ip</i> | SALRFLNL    | 64125    | 250911   | 0.01  | -3.9   |
| 319565 | <i>Syne2</i>   | DLIQTIHEL   | 64700    | 102995   | 0.25  | -1.6   |
| 108143 | <i>Taf9</i>    | SGLKYVNV    | 1888511  | 964010   | 0.04  | 2.0    |
| 216198 | <i>Tcp11l2</i> | KATTNIVEM   | 39337    | 92718    | 0.19  | -2.4   |
| 217353 | <i>Tmc6</i>    | ASYLFRGL    | 42599    | 104982   | 0.01  | -2.5   |
| 67511  | <i>Tmed9</i>   | VIGNYRTQL   | 12000    | 82097    | 0.01  | -6.8   |
| 67878  | <i>Tmem33</i>  | QSIAFISRL   | 312693   | 175900   | 0.23  | 1.8    |
| 21916  | <i>Tmod1</i>   | SSIVNKEGL   | 676206   | 64142    | 0.004 | 10.5   |
| 320938 | <i>Tnpo3</i>   | GLLEIAHSL   | 12000    | 40153    | 0.10  | -3.3   |
| 22057  | <i>Tob1</i>    | ISYLYNKL    | 137897   | 149667   | 0.87  | -1.1   |
| 21973  | <i>Top2a</i>   | NSMVLFDHV   | 187186   | 12000    | 0.02  | 15.6   |
| 21990  | <i>Tph1</i>    | WGTFREL     | 57225    | 54992    | 0.90  | 1.0    |
| 21990  | <i>Tph1</i>    | FSENEVGGL   | 614142   | 228500   | 0.07  | 2.7    |
| 12751  | <i>Tpp1</i>    | IQRVNTEFM   | 56506    | 48388    | 0.66  | 1.2    |
| 100683 | <i>Trrap</i>   | QDPVFQKL    | 63687    | 47544    | 0.41  | 1.3    |
| 56085  | <i>Ubqln1</i>  | RALSNLESI   | 402950   | 278602   | 0.31  | 1.4    |



|        |               |            |         |         |      |      |
|--------|---------------|------------|---------|---------|------|------|
| 224826 | <i>Ubr2</i>   | VAYKFPPELL | 36262   | 33865   | 0.62 | 1.1  |
| 216825 | <i>Usp22</i>  | FAVWNHQGTL | 264021  | 179805  | 0.52 | 1.5  |
| 230895 | <i>Vps13d</i> | INIHYTQL   | 81820   | 133304  | 0.41 | -1.6 |
| 80743  | <i>Vps16</i>  | VSFTYRYL   | 1178420 | 1298769 | 0.70 | -1.1 |
| 77573  | <i>Vps33a</i> | GSLANHTSI  | 235063  | 137938  | 0.23 | 1.7  |
| 233405 | <i>Vps33b</i> | ASLVNADKL  | 1141391 | 750579  | 0.41 | 1.5  |
| 65114  | <i>Vps35</i>  | FSEENHEPL  | 100228  | 72330   | 0.36 | 1.4  |
| 22375  | <i>Wars</i>   | YTVENAKDII | 164659  | 97161   | 0.18 | 1.7  |
| 69544  | <i>Wdr5b</i>  | AALENDKTI  | 995387  | 846431  | 0.64 | 1.2  |
| 74781  | <i>Wipi2</i>  | SGYKFFSL   | 108304  | 60742   | 0.28 | 1.8  |
| 22446  | <i>Xlr3b</i>  | VAAANREVL  | 1019171 | 12000   | 0.02 | 84.9 |
| 68090  | <i>Yif1a</i>  | SGYKYVGM   | 172942  | 68389   | 0.14 | 2.5  |
| 66980  | <i>Zdhhc6</i> | SVIKFENL   | 57125   | 76621   | 0.59 | -1.3 |

**Table S7.** List of primers for quantitative real-time PCR analyses

| Gene symbol   | Ref seq        | Gene ID | Primer_A                | Primer_B                   | Probe                         |
|---------------|----------------|---------|-------------------------|----------------------------|-------------------------------|
| 2900073G15RIK | NM_026064      | 67268   | CGCTTGCTTTGATGAGGAA     | GTCAGCAGTCCCTCAGGT         | Universal Library probe: #79  |
| 9230105E10RIK | NM_175677      | 319236  | GGCCACAAAACAGCTCTCAT    | CAGCCTTTGCAGAACTACCTG      | Universal Library probe: #68  |
| Atxn10        | NM_016843.2    | 54138   | GAGCCTCACACCGAGGATAA    | TGGACGTCATTTACACAAGA       | Universal Library probe: #92  |
| Bach2         | NM_007521      | 12014   | CATCTCTCCTCTGCCAGT      | AGACATGCCGTTCAAACCAT       | Universal Library probe: #89  |
| Cend3         | NM_007632.2    | 12445   | GCATACTGGATGCTGGAGGT    | GGTAGCGATCCAGGTAGTTCA      | Universal Library probe: #88  |
| Ccnf          | NM_007634.2    | 12449   | CGGAAACACAGGGACTACG     | TCCACCTGCACAGGCTTT         | Universal Library probe: #3   |
| Cd97          | NM_011925      | 26364   | ATCCAGCCACGGTCAACTAC    | TTGTTGGGTTTGAGTCTCCAT      | Universal Library probe: #11  |
| Cdkn1b        | NM_009875      | 12576   | GAGCAGTGTCCAGGGATGAG    | TCTGTTGGCCCTTTTGTTTT       | Universal Library probe: #62  |
| Chek1         | NM_007691.2    | 12649   | GAGGGAAGGCCATATCCAGT    | TTGTTCAAGGCATCCCTATGTC     | Universal Library probe: #25  |
| Copb1         | NM_033370.3    | 70349   | CCGCTTGGTGAATTAAGAG     | GGATGTCCATGACCAGATCC       | Universal Library probe: #15  |
| Cxcr4         | NM_009911.3    | 12767   | TGGAACCGATCAGTGTGAGT    | GGGCAGGAAGATCCTATTGA       | Universal Library probe: #38  |
| Ddx47         | NM_026360      | 67755   | TGGGAAGGCCATTACTTTTG    | AGCTTCTTCCAATCAAAGTCT      | Universal Library probe: #11  |
| Ddx5          | NM_007840      | 13207   | AGAGGTGATGGGCCTATTTG    | CAAGCGACAAGCTCGACA         | Universal Library probe: #66  |
| Ddx6          | NM_007841.3    | 13209   | CAAAAAGTGCCTGCTCAA      | GGAGTTGCAGAAAATGATGGA      | Universal Library probe: #80  |
| Dhx15         | NM_007839.2    | 13204   | TCGACAGTGTCCAAATACAT    | CAGGCCTCATCAATTTCTCTC      | Universal Library probe: #12  |
| Dnmt1         | NM_010066.3    | 13433   | CTCATTGGCTTCTCCACTGC    | GCCCAAATATTGGCTCATACTC     | Universal Library probe: #107 |
| Eif3s10       | NM_010123      | 13669   | GATTCAAGGACCTGGAG       | CATCCCAGTCTCTCGTCTC        | Universal Library probe: #93  |
| Eif3s12       | NM_028659      | 73830   | GCTCAAGGGTATCGACAGGT    | TTTGGCTTGTCTCCACAT         | Universal Library probe: #1   |
| Eif3s2        | NM_018799      | 54709   | GAAAGCCATGGATGACCA      | TCAAAAGCCAAATGGAAGAAC      | Universal Library probe: #22  |
| Gtpbp4        | NM_027000.2    | 69237   | TGGGAGATGATTACATTTTGA   | GCCTTCCCAAATTTCTGGTAT      | Universal Library probe: #95  |
| Igtp          | NM_018738      | 16145   | CGGAGAGCTGTGGAGAGAGA    | TGCCATGTTTATGAAAAGTGAATA   | Universal Library probe: #108 |
| Krt5          | NM_027011.2    | 110308  | CCTTCGAAACACCAAGCAC     | GTTCTGGAGTTGGCACACT        | Universal Library probe: #110 |
| Krt7          | NM_033073      | 110310  | GGAGATGGCCAACCACAG      | GGCCTGGAGTGTCTCAAACCT      | Universal Library probe: #41  |
| Mapk1         | NM_011949.3    | 26413   | GACAGAGTACGTAGCCACACGTT | AGCCCAAGACCAATATCAA        | Universal Library probe: #50  |
| Mark2         | NM_007928.2    | 13728   | GAAAGGGACACGGAGCAG      | AGCAGAGGTGGCTGAGTTG        | Universal Library probe: #3   |
| Mns1          | NM_008613      | 17427   | GAGGCAGAGACCCATCCTG     | GCTCAAAGCTCTTTTTGGTC       | Universal Library probe: #63  |
| Mylc2b        | NM_023402      | 67938   | AGGAGGACCTGCACGACA      | GTCCAGGTAGGCATCAGTGG       | Universal Library probe: #60  |
| Narf1         | NM_026238      | 67563   | GCAAGTACTTCCAAGTGAACCAA | GCAGTCATTCAAGGAGACCT       | Universal Library probe: #78  |
| Pa2g4         | NM_011119      | 18813   | GGTCGTGACCAAGTATAAGATGG | CAGACACACCTGAGCTGGAA       | Universal Library probe: #22  |
| Pcna          | NM_011045.2    | 18538   | CTAGCCATGGGCGTGAAC      | GAATACTAGTGCTAAGGTGTCTGCAT | Universal Library probe: #41  |
| Pdcd10        | NM_019745.2    | 56426   | TGGCAGCTGATGACGTAGAA    | TGCCTTTTCATTTAGGTCCTG      | Universal Library probe: #21  |
| Pde2a         | NM_001008548   | 207728  | TCGGACCTACTGGGAAAAGC    | CAGGGGTATGACCAGCACTT       | Universal Library probe: #64  |
| Per1          | NM_011065      | 18626   | TGGACTTGACACCTCTTCTGTG  | TGCTTTAGATCGGCAGTGGT       | Universal Library probe: #71  |
| Pfdn5         | NM_027044      | 56612   | AGGAGAAGCATGCCATGAAG    | AGTGCACTCTCAGGCTTTGAC      | Universal Library probe: #100 |
| Pik3ap1       | NM_031376      | 83490   | CACGGTCTCTGTGAAAGCAC    | CCAGGTCACCAAGATAGACC       | Universal Library probe: #91  |
| Psmb8         | NM_010724      | 16913   | GTTGGCCAAGGAGTGACAG     | CAGCATCATGTTGGAAAGCA       | Universal Library probe: #89  |
| Ptpn6         | NM_013545.2    | 15170   | TCTGGATGCCACAGTCAATG    | GGCCAGTATGGGACACATTT       | Universal Library probe: #51  |
| Rcc2          | NM_173867      | 108911  | CTATCAGTTGGGTCATCG      | AGAAGATGCCATCCAGAGTCTT     | Universal Library probe: #79  |
| Rmnd5a        | NM_024288      | 68477   | TTCTCCGACAAGGAATGCT     | TTGGGTCTACAGACAGACCAGA     | Universal Library probe: #73  |
| Specc1        | NM_001029936.2 | 432572  | AAATGCCAGGCTGCAGAA      | CTCTGGCTCTTCAATCACAGG      | Universal Library probe: #33  |
| Stat3         | NM_213659.2    | 20848   | AGTCTCGCCTCCTCCAGAC     | GCTGCTTCTGTCACTACGG        | Universal Library probe: #26  |
| Stk11ip       | NM_027886.2    | 71728   | GGTGCCCCAGTTTTTCTACC    | AACAGGGACACAGGACAGGT       | Universal Library probe: #41  |
| Tmed9         | NM_026211      | 67511   | TAAAAGACCCGAGGACAAG     | TGTGGGAGGTGAAGGTGAAC       | Universal Library probe: #21  |
| Tmod1         | NM_021883      | 21916   | CTGGTCGAGCTGAAAATCG     | TCTCCATTTCCACTTTGTTGC      | Universal Library probe: #21  |
| Top2a         | NM_011623      | 21973   | AATGGAAATATGTCGCCAGTG   | CCTGTTTATGTATCACCTTCAGTG   | Universal Library probe: #48  |
| Tpp1          | NM_009906.2    | 12751   | CGGATCCTAGCTCCTCAA      | GTCAGGGGTGATGGTTGAA        | Universal Library probe: #88  |
| Ubr2          | NM_146078.2    | 224826  | CAGCAGCTCTGAAGTTGTGG    | TGTAAGTTCTGGCGATCACATC     | Universal Library probe: #101 |
